# Supplementary material
Source: PubMed Central journal article supplement (PMC7094007)
Supplement: advancesADV2019000901-suppl1.pdf [file advancesADV2019000901-suppl1.pdf]

Supplemental Figure 1

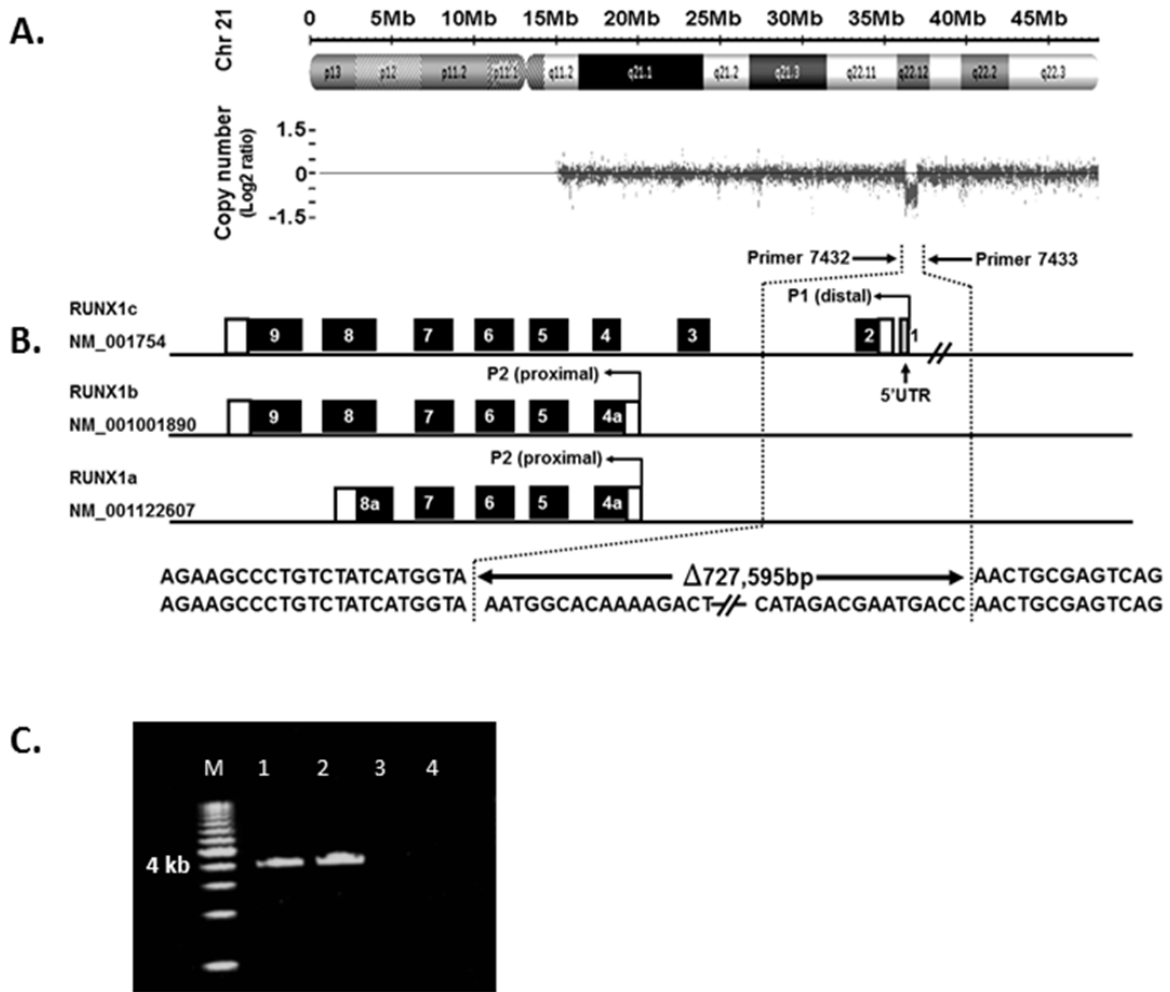

Supplemental Figure 2

A.

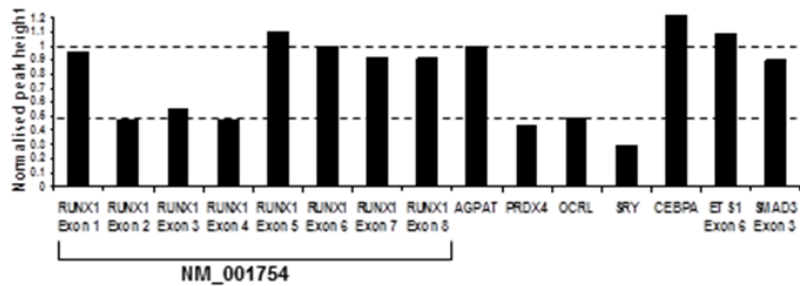

B.

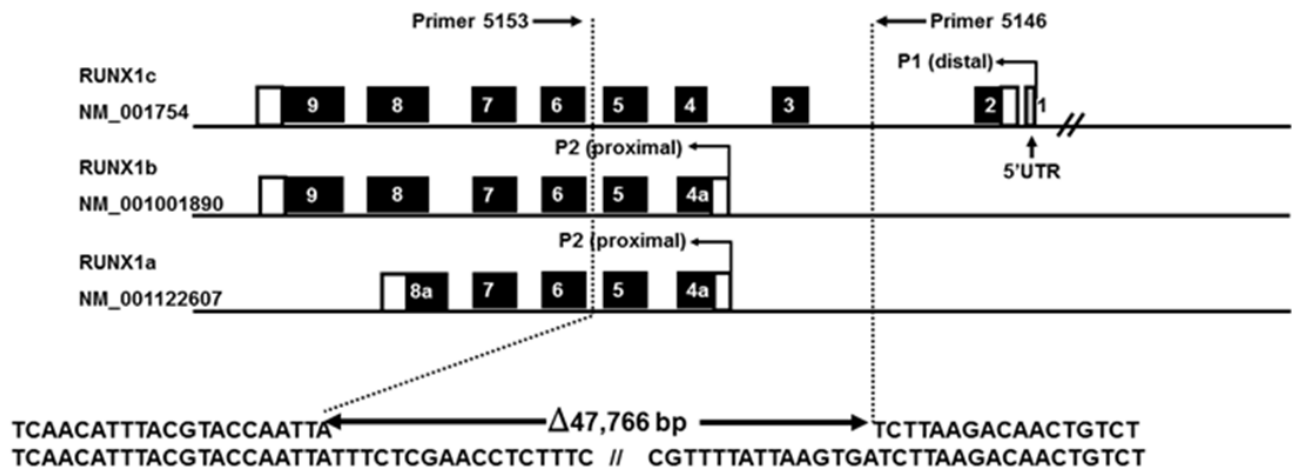

Supplemental Figure 3

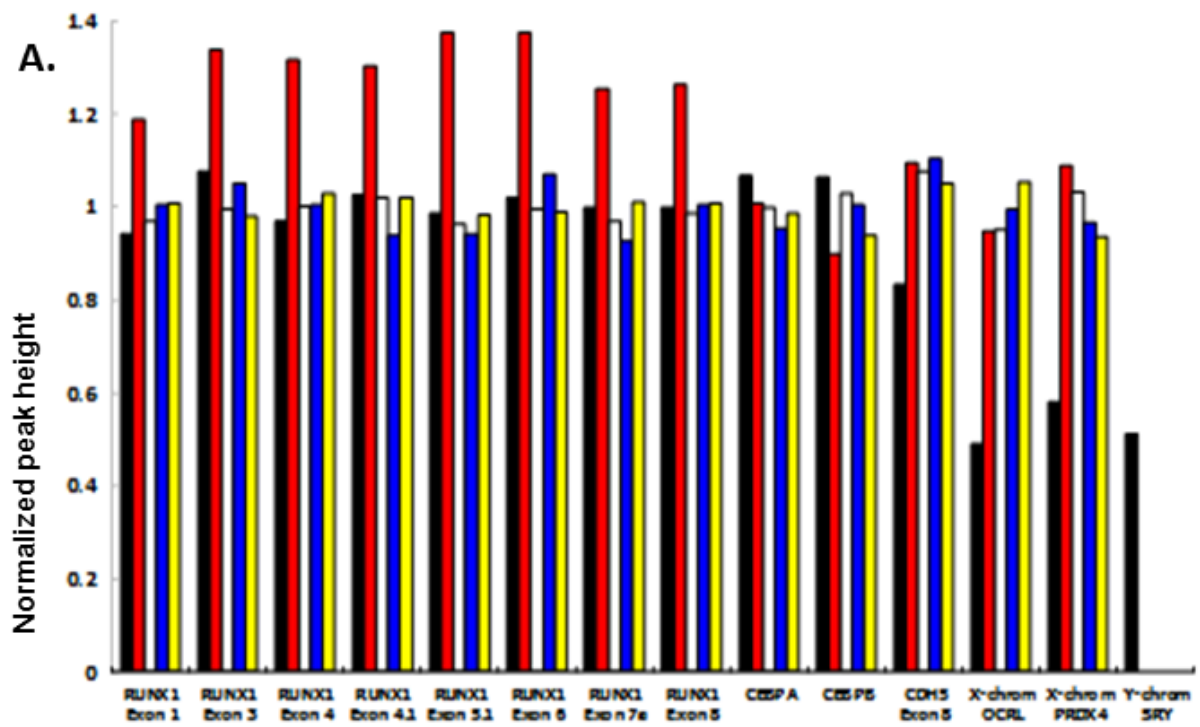

**B. Germline RUNX1 p.Leu112Cysfs\*9**

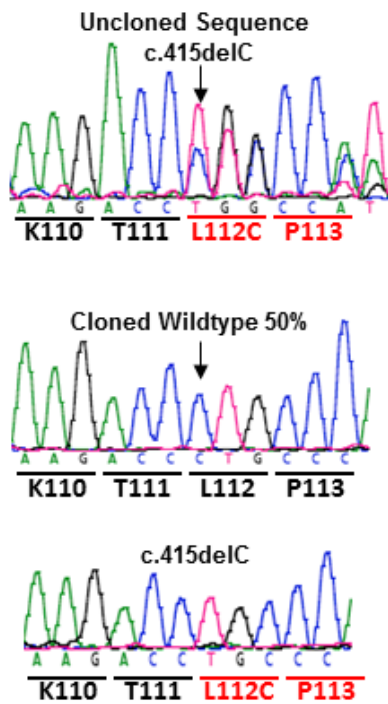

**C. Somatic RUNX1 p.Pro203Arg**

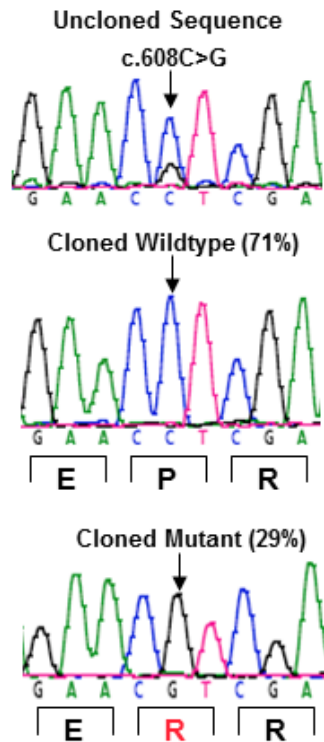

## Supplemental Figure 4

A.

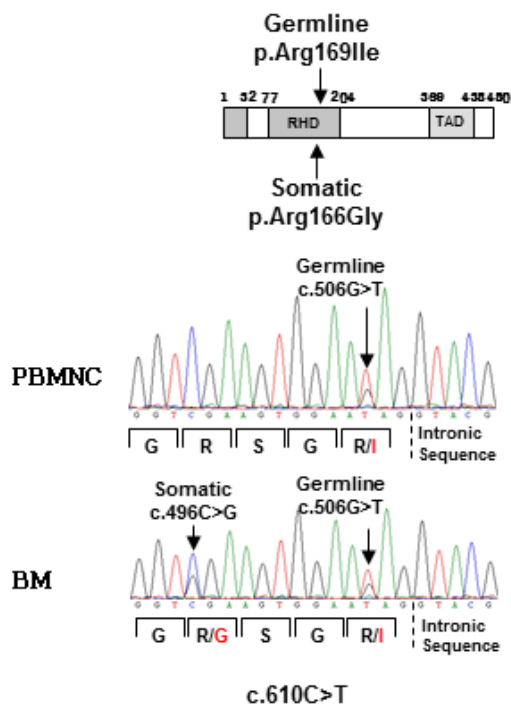

B.

| Gene  | Mutation   | Cancer type      | Number | Source        |
|-------|------------|------------------|--------|---------------|
| RUNX1 | R169K      | Breast carcinoma | 2      | COSMIC        |
| RUNX1 | R169S      | MDS              | 1      | COSMIC        |
| RUNX1 | R169Kfs*44 | Breast carcinoma | 3      | TCGA          |
| RUNX1 | R169Kfs*8  | AML              | 1      | Gaidzik, 2016 |
| RUNX1 | R169Qfs*10 | AML              | 1      | Gaidzik, 2016 |

C. **LYL1 prom-LUC in Cos7 cells**

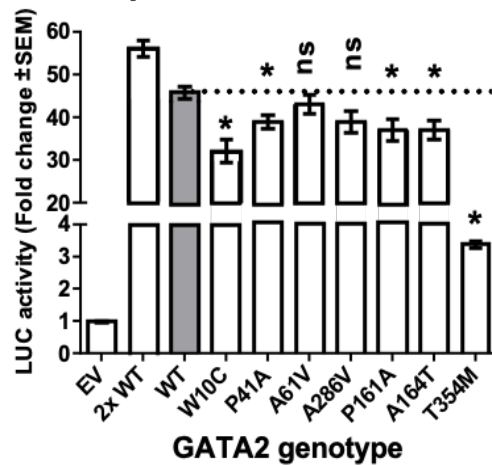

Supplemental Figure 5

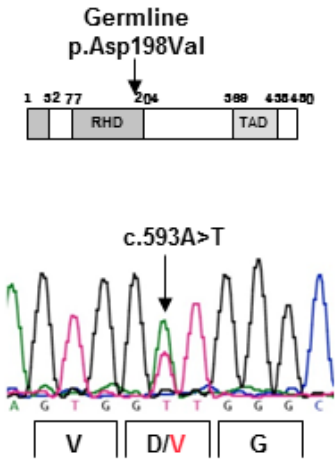

Supplemental Figure 6

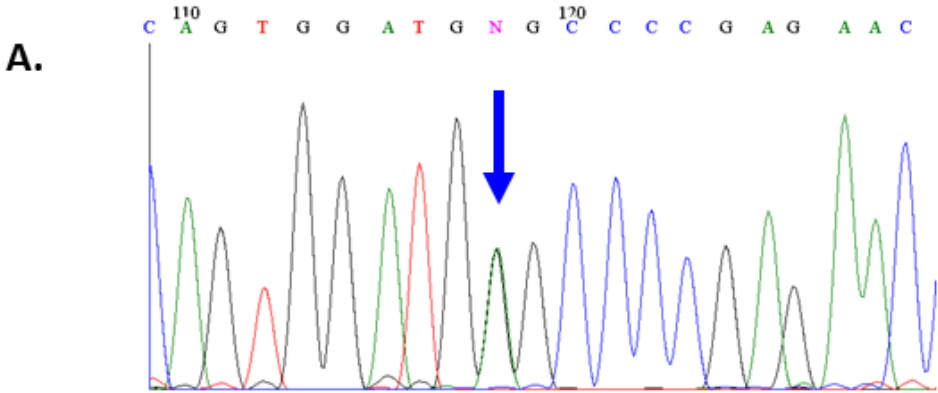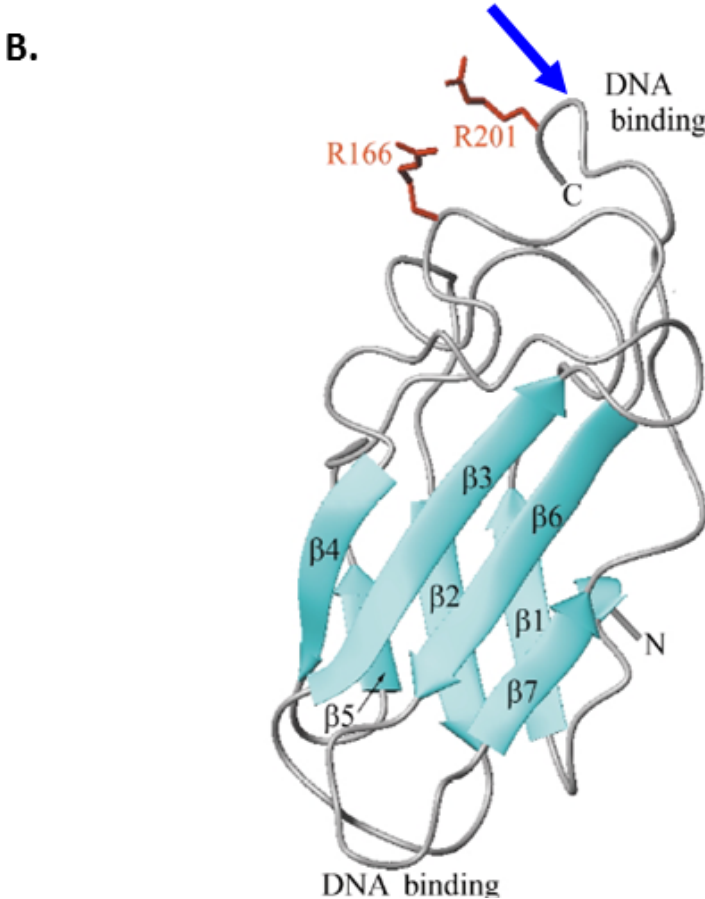

Supplemental Figure 7

A.

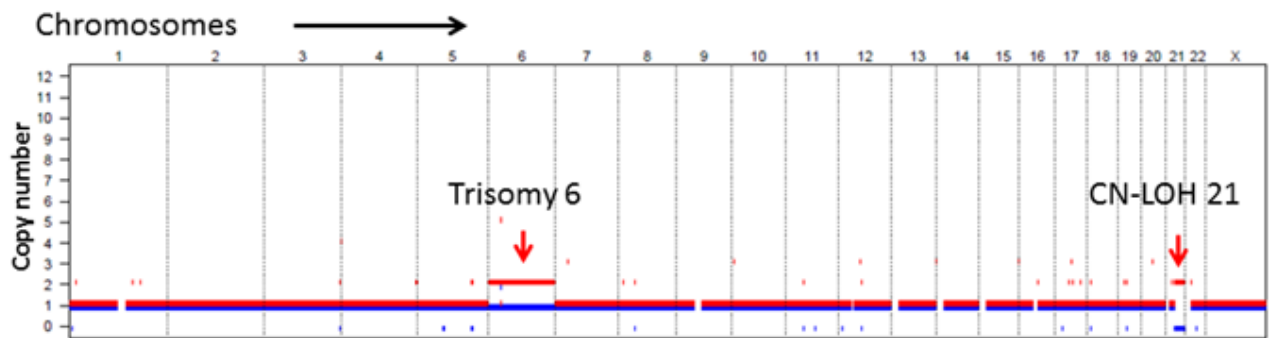

B.

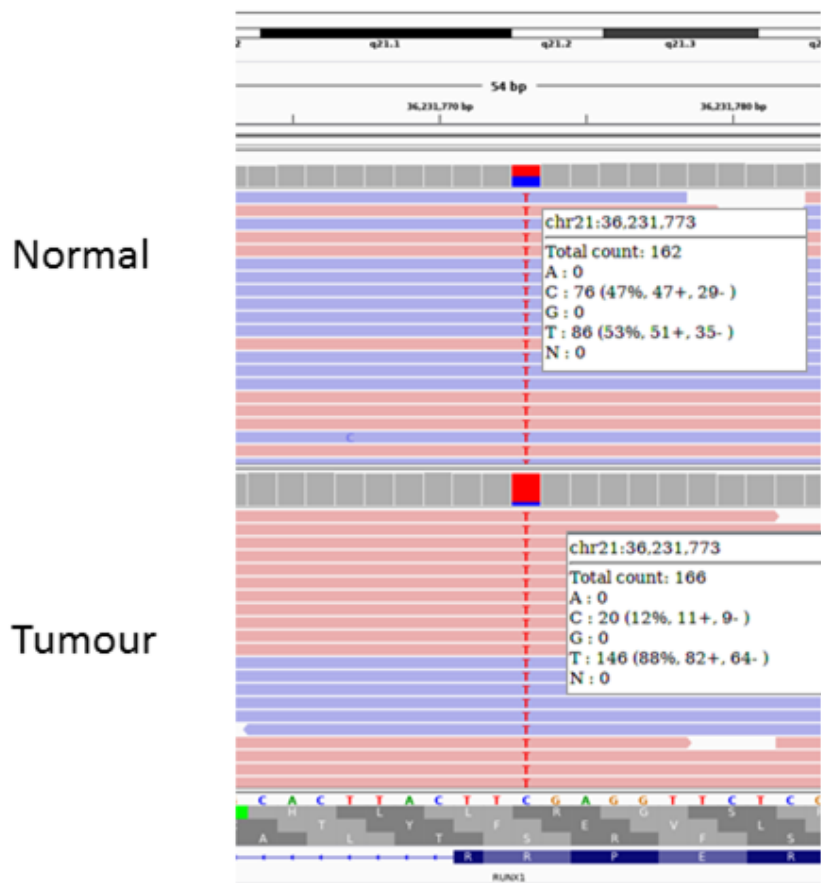

# Supplemental Figure 8

**A.**

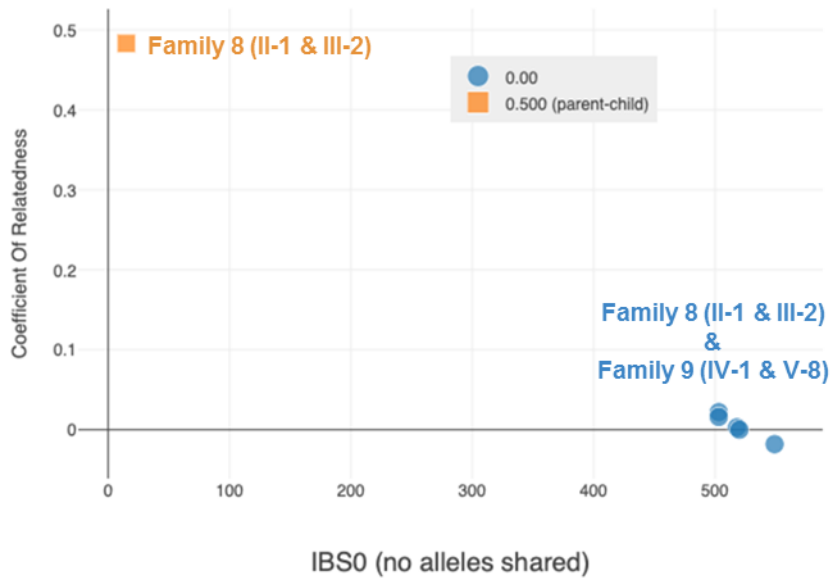

**B.**

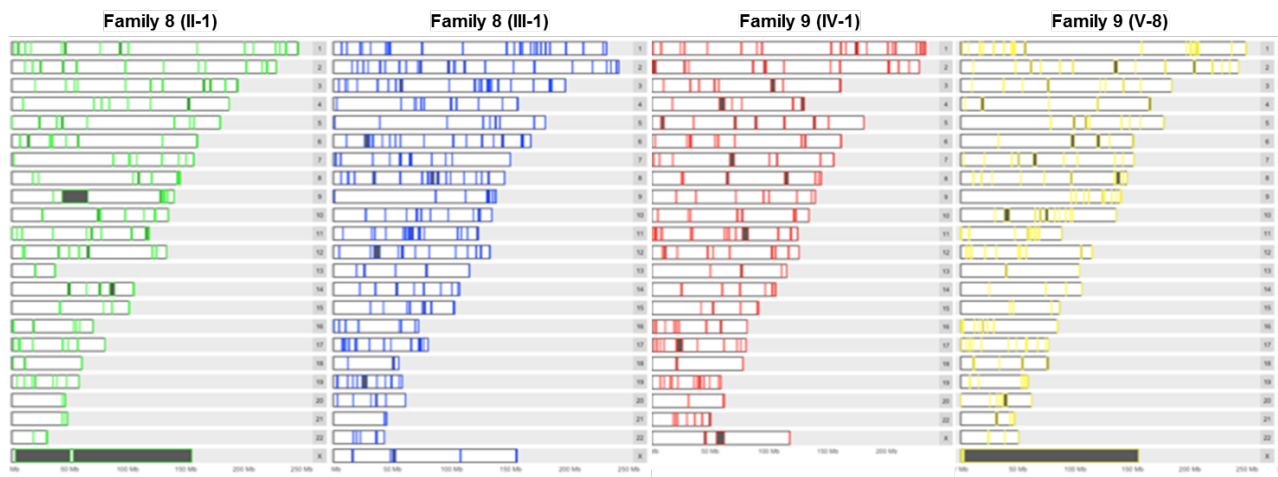

**C.**

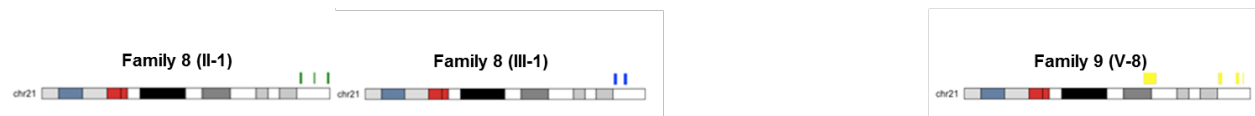



# Supplemental Figure 9

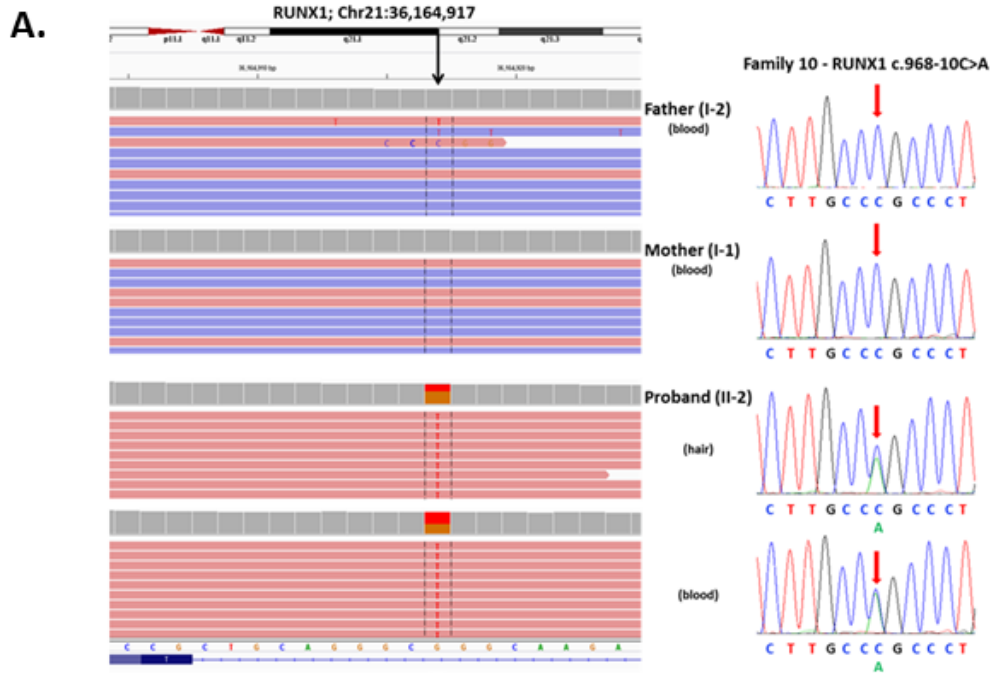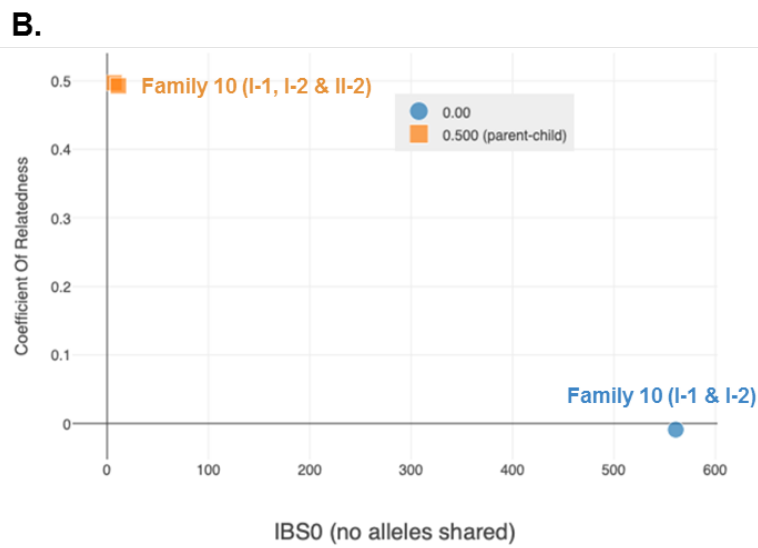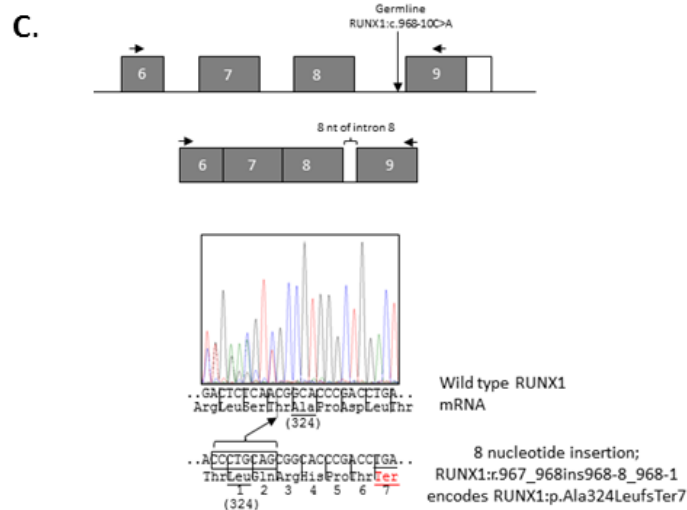

Supplemental Figure 10

| Family                 | Family 8               | Family 5 | Family 4 | Family 4 | Family 8 | Family 4 | Family 9 | Family 7 | Family 5 | Family 1 | Family 7 | Family 2 | Family 7 | Family 4 | Family 10 | Pre-leukemic |         | Myeloid |         | Total |         | Key oncoplot |   |
|------------------------|------------------------|----------|----------|----------|----------|----------|----------|----------|----------|----------|----------|----------|----------|----------|-----------|--------------|---------|---------|---------|-------|---------|--------------|---|
|                        | III-1                  | III-2    | II-1     | II-5     | II-1     | II-3     | IV-1     | III-2    | II-2     | II-2     | III-1    | II-1     | II-1     | II-2     | II-4      | II-1         | mutated | %       | mutated | %     | mutated |              | % |
| <b>Malignancy type</b> |                        |          |          |          |          |          |          |          |          |          |          |          |          |          |           | 4            | 100     | 11      | 100     | 16    | 100     |              |   |
| Germline RUNX1         |                        |          |          |          |          |          |          |          |          |          |          |          |          |          |           | 0            | 0       | 4       | 36.4    | 4     | 25.0    |              |   |
| Somatic RUNX1          |                        |          |          |          |          |          |          |          |          |          |          |          |          |          |           | 0            | 0       | 4       | 36.4    | 4     | 25.0    |              |   |
| <b>CHIP genes</b>      |                        |          |          |          |          |          |          |          |          |          |          |          |          |          |           | 0            | 0       | 0       | 0.0     | 0     | 0.0     |              |   |
| Activating signaling   | CBL <sup>CHIP</sup>    |          |          |          |          |          |          |          |          |          |          |          |          |          |           |              | 0       | 0       | 0       | 0.0   | 0       | 0.0          |   |
|                        | FLT3                   |          |          |          |          |          |          |          |          |          |          |          |          |          |           |              | 0       | N/A     | 1       | 20.0  | 1       | 16.7         |   |
|                        | JAK1                   |          |          |          |          |          |          |          |          |          |          |          |          |          |           |              | 0       | 0       | 0       | 0.0   | 0       | 0.0          |   |
|                        | JAK2 <sup>CHIP</sup>   |          |          |          |          |          |          |          |          |          |          |          |          |          |           |              | 0       | 0       | 2       | 18.2  | 2       | 12.5         |   |
|                        | JAK3                   |          |          |          |          |          |          |          |          |          |          |          |          |          |           |              | 0       | N/A     | 0       | 0.0   | 0       | 0.0          |   |
|                        | KIT                    |          |          |          |          |          |          |          |          |          |          |          |          |          |           |              | 0       | 0       | 0       | 0.0   | 0       | 0.0          |   |
|                        | KRAS                   |          |          |          |          |          |          |          |          |          |          |          |          |          |           |              | 0       | 0       | 0       | 0.0   | 1       | 6.3          |   |
|                        | MPL                    |          |          |          |          |          |          |          |          |          |          |          |          |          |           |              | 0       | 0       | 1       | 9.1   | 0       | 0.0          |   |
|                        | NOTCH1                 |          |          |          |          |          |          |          |          |          |          |          |          |          |           |              | 0       | 0       | 0       | 0.0   | 0       | 0.0          |   |
|                        | NRAS                   |          |          |          |          |          |          |          |          |          |          |          |          |          |           |              | 0       | 0       | 1       | 9.1   | 1       | 6.3          |   |
|                        | PTPN11                 |          |          |          |          |          |          |          |          |          |          |          |          |          |           |              | 0       | 0       | 0       | 0.0   | 0       | 0.0          |   |
|                        | SAMD9                  |          |          |          |          |          |          |          |          |          |          |          |          |          |           |              | 0       | N/A     | 0       | 0.0   | 0       | 0.0          |   |
| SH2B3                  |                        |          |          |          |          |          |          |          |          |          |          |          |          |          |           | 0            | N/A     | 1       | 20.0    | 1     | 16.7    |              |   |
| Cohesin complex        | PDS5B                  |          |          |          |          |          |          |          |          |          |          |          |          |          |           |              | 0       | N/A     | 0       | 0.0   | 0       | 0.0          |   |
|                        | RAD21                  |          |          |          |          |          |          |          |          |          |          |          |          |          |           |              | 0       | N/A     | 0       | 0.0   | 0       | 0.0          |   |
|                        | STAG2                  |          |          |          |          |          |          |          |          |          |          |          |          |          |           |              | 0       | 0       | 0       | 0.0   | 0       | 0.0          |   |
| Epigenetic regulator   | ASXL1 <sup>CHIP</sup>  |          |          |          |          |          |          |          |          |          |          |          |          |          |           |              | 0       | 0       | 0       | 0.0   | 0       | 0.0          |   |
|                        | BCOR <sup>CHIP</sup>   |          |          |          |          |          |          |          |          |          |          |          |          |          |           |              | 0       | N/A     | 1       | 20.0  | 1       | 16.7         |   |
|                        | BCORL1 <sup>CHIP</sup> |          |          |          |          |          |          |          |          |          |          |          |          |          |           |              | 0       | N/A     | 1       | 20.0  | 1       | 16.7         |   |
|                        | CREBBP <sup>CHIP</sup> |          |          |          |          |          |          |          |          |          |          |          |          |          |           |              | 0       | N/A     | 0       | 0.0   | 0       | 0.0          |   |
|                        | DNMT3A <sup>CHIP</sup> |          |          |          |          |          |          |          |          |          |          |          |          |          |           |              | 3       | 75.0    | 1       | 9.1   | 1       | 6.3          |   |
|                        | EZH2 <sup>CHIP</sup>   |          |          |          |          |          |          |          |          |          |          |          |          |          |           |              | 0       | 0       | 1       | 9.1   | 1       | 6.3          |   |
|                        | TET2 <sup>CHIP</sup>   |          |          |          |          |          |          |          |          |          |          |          |          |          |           |              | 2       | 50.0    | 1       | 9.1   | 1       | 6.3          |   |
|                        | KMT2A                  |          |          |          |          |          |          |          |          |          |          |          |          |          |           |              | 0       | N/A     | 1       | 20.0  | 1       | 16.7         |   |
|                        | IDH2                   |          |          |          |          |          |          |          |          |          |          |          |          |          |           |              | 0       | 0       | 0       | 0.0   | 0       | 0.0          |   |
|                        | IDH1                   |          |          |          |          |          |          |          |          |          |          |          |          |          |           |              | 0       | 0       | 0       | 0.0   | 0       | 0.0          |   |
| Splicing               | SF3B1 <sup>CHIP</sup>  |          |          |          |          |          |          |          |          |          |          |          |          |          |           |              | 0       | 0       | 0       | 0.0   | 0       | 0.0          |   |
|                        | SRSF2 <sup>CHIP</sup>  |          |          |          |          |          |          |          |          |          |          |          |          |          |           |              | 0       | 0       | 0       | 0.0   | 0       | 0.0          |   |
|                        | ZRSR2                  |          |          |          |          |          |          |          |          |          |          |          |          |          |           |              | 0       | N/A     | 0       | 0.0   | 0       | 0.0          |   |
|                        | U2AF1                  |          |          |          |          |          |          |          |          |          |          |          |          |          |           |              | 1       | 25.0    | 1       | 9.1   | 2       | 12.5         |   |
|                        | U2AF2                  |          |          |          |          |          |          |          |          |          |          |          |          |          |           |              | 0       | 0       | 0       | 0.0   | 0       | 0.0          |   |
| Transcription factor   | GATA2                  |          |          |          |          |          |          |          |          |          |          |          |          |          |           |              | 1       | 25.0    | 0       | 0.0   | 0       | 0.0          |   |
|                        | CEBPA                  |          |          |          |          |          |          |          |          |          |          |          |          |          |           |              | 0       | 0       | 0       | 0.0   | 0       | 0.0          |   |
| Tumor suppressor       | TP53 <sup>CHIP</sup>   |          |          |          |          |          |          |          |          |          |          |          |          |          |           |              | 0       | N/A     | 0       | 0.0   | 0       | 0.0          |   |
|                        | PHF6                   |          |          |          |          |          |          |          |          |          |          |          |          |          |           |              | 0       | N/A     | 1       | 20.0  | 1       | 16.7         |   |
|                        | RB1                    |          |          |          |          |          |          |          |          |          |          |          |          |          |           |              | 0       | N/A     | 0       | 0.0   | 0       | 0.0          |   |
|                        | WT1                    |          |          |          |          |          |          |          |          |          |          |          |          |          |           |              | 0       | N/A     | 3       | 60.0  | 0       | 0.0          |   |
| Other                  | NPM1                   |          |          |          |          |          |          |          |          |          |          |          |          |          |           |              | 0       | 0       | 0       | 0.0   | 0       | 0.0          |   |
| Cytogenetics           |                        |          |          |          |          |          |          |          |          |          |          |          |          |          |           |              |         |         |         |       |         |              |   |
|                        |                        |          |          |          |          |          |          |          |          |          |          |          |          |          |           |              |         |         |         |       |         |              |   |
|                        |                        |          |          |          |          |          |          |          |          |          |          |          |          |          |           |              |         |         |         |       |         |              |   |

# Supplemental Figure 11

| Reference              | Malignancy type | Pre-leukemic |      | Involved |      | Total   |      | Malignancy type          |
|------------------------|-----------------|--------------|------|----------|------|---------|------|--------------------------|
|                        |                 | mutated      | %    | mutated  | %    | mutated | %    |                          |
| Gem15 <sup>chIP</sup>  | AML             | 5            | 21.7 | 18       | 40.0 | 24      | 33.3 | AML                      |
| SOX2 <sup>chIP</sup>   | AML             | 5            | 21.7 | 18       | 40.0 | 24      | 33.3 | AML                      |
| CBF <sup>chIP</sup>    | AML             | 0            | 0.0  | 0        | 0.0  | 0       | 1.6  | AML                      |
| FLT3 <sup>chIP</sup>   | AML             | 0            | 0.0  | 4        | 10.3 | 5       | 8.1  | AML                      |
| JAK1 <sup>chIP</sup>   | AML             | 0            | 0.0  | 1        | 3.3  | 2       | 4.0  | AML                      |
| JAK2 <sup>chIP</sup>   | AML             | 0            | 0.0  | 4        | 8.9  | 4       | 5.6  | AML                      |
| JAK3 <sup>chIP</sup>   | AML             | 0            | 0.0  | 1        | 2.8  | 2       | 3.8  | AML                      |
| KIT <sup>chIP</sup>    | AML             | 0            | 0.0  | 2        | 4.4  | 2       | 2.8  | AML                      |
| KLF6 <sup>chIP</sup>   | AML             | 0            | 0.0  | 1        | 2.2  | 1       | 1.4  | AML                      |
| NPM <sup>chIP</sup>    | AML             | 0            | 0.0  | 1        | 2.2  | 3       | 4.2  | AML                      |
| NOTCH1 <sup>chIP</sup> | AML             | 0            | 0.0  | 1        | 2.2  | 1       | 1.4  | AML                      |
| NRAS <sup>chIP</sup>   | AML             | 0            | 0.0  | 1        | 2.2  | 1       | 1.4  | AML                      |
| PTPN11 <sup>chIP</sup> | AML             | 0            | 0.0  | 1        | 2.2  | 1       | 1.4  | AML                      |
| SAMD9 <sup>chIP</sup>  | AML             | 0            | 0.0  | 1        | 4.5  | 1       | 2.6  | AML                      |
| SH2B3 <sup>chIP</sup>  | AML             | 0            | 0.0  | 2        | 8.3  | 2       | 5.0  | AML                      |
| POSB <sup>chIP</sup>   | AML             | 0            | 0.0  | 1        | 4.5  | 1       | 2.6  | AML                      |
| BCOR <sup>chIP</sup>   | AML             | 0            | 0.0  | 1        | 3.8  | 1       | 2.9  | AML                      |
| STAG2 <sup>chIP</sup>  | AML             | 0            | 0.0  | 1        | 3.8  | 1       | 2.9  | AML                      |
| ASXL1 <sup>chIP</sup>  | AML             | 0            | 0.0  | 1        | 2.2  | 2       | 2.8  | AML                      |
| BCOR <sup>chIP</sup>   | AML             | 0            | 0.0  | 6        | 17.6 | 6       | 11.3 | AML                      |
| BCORL1 <sup>chIP</sup> | AML             | 0            | 0.0  | 3        | 8.8  | 3       | 5.7  | AML                      |
| CREBBP <sup>chIP</sup> | AML             | 0            | 0.0  | 1        | 4.2  | 1       | 2.5  | AML                      |
| DNMT3A <sup>chIP</sup> | AML             | 3            | 13.0 | 3        | 6.7  | 6       | 8.3  | AML                      |
| EZH2 <sup>chIP</sup>   | AML             | 0            | 0.0  | 2        | 4.4  | 3       | 4.2  | AML                      |
| TEF1 <sup>chIP</sup>   | AML             | 2            | 8.7  | 4        | 9.9  | 7       | 9.7  | AML                      |
| TEF2 <sup>chIP</sup>   | AML             | 0            | 0.0  | 1        | 2.2  | 1       | 1.4  | AML                      |
| TEF3 <sup>chIP</sup>   | AML             | 0            | 0.0  | 1        | 2.2  | 1       | 1.4  | AML                      |
| IDH1 <sup>chIP</sup>   | AML             | 0            | 0.0  | 1        | 2.2  | 1       | 1.4  | AML                      |
| SF3B1 <sup>chIP</sup>  | AML             | 0            | 0.0  | 1        | 2.5  | 1       | 1.6  | AML                      |
| SRSF7 <sup>chIP</sup>  | AML             | 0            | 0.0  | 2        | 5.0  | 2       | 3.2  | AML                      |
| ZRSR2 <sup>chIP</sup>  | AML             | 0            | 0.0  | 1        | 2.9  | 1       | 1.9  | AML                      |
| U2AF1 <sup>chIP</sup>  | AML             | 1            | 5.3  | 1        | 2.5  | 2       | 3.2  | AML                      |
| U2AF2 <sup>chIP</sup>  | AML             | 1            | 5.3  | 1        | 2.5  | 2       | 3.2  | AML                      |
| U2AF3 <sup>chIP</sup>  | AML             | 1            | 5.3  | 1        | 2.5  | 2       | 3.2  | AML                      |
| CAT2 <sup>chIP</sup>   | AML             | 0            | 0.0  | 7        | 4.4  | 7       | 2.8  | AML                      |
| CER2A <sup>chIP</sup>  | AML             | 0            | 0.0  | 1        | 2.6  | 1       | 1.6  | AML                      |
| TP53 <sup>chIP</sup>   | AML             | 0            | 0.0  | 1        | 2.6  | 6       | 17.6 | AML                      |
| PHF6 <sup>chIP</sup>   | AML             | 0            | 0.0  | 1        | 4.5  | 1       | 2.6  | AML                      |
| RBI <sup>chIP</sup>    | AML             | 0            | 0.0  | 3        | 7.7  | 5       | 8.1  | AML                      |
| WT1 <sup>chIP</sup>    | AML             | 0            | 0.0  | 3        | 7.7  | 5       | 8.1  | AML                      |
| NPM1 <sup>chIP</sup>   | AML             | 0            | 0.0  | 0        | 0.0  | 0       | 0.0  | AML                      |
| Other                  |                 | 0            | 0.0  | 0        | 0.0  | 0       | 0.0  |                          |
| Cytogenetics           |                 |              |      |          |      |         |      |                          |
|                        |                 |              |      |          |      |         |      | del(5q)                  |
|                        |                 |              |      |          |      |         |      | del(11q23)               |
|                        |                 |              |      |          |      |         |      | t(3;8)-7                 |
|                        |                 |              |      |          |      |         |      | +8 UPD21                 |
|                        |                 |              |      |          |      |         |      | +21                      |
|                        |                 |              |      |          |      |         |      | Del(7q)(2;22)(p23;q13.1) |
|                        |                 |              |      |          |      |         |      | UPD21                    |
|                        |                 |              |      |          |      |         |      | t(2;11)                  |
|                        |                 |              |      |          |      |         |      | t(1;3)                   |
|                        |                 |              |      |          |      |         |      | del(7)(q22)(20)          |
|                        |                 |              |      |          |      |         |      | del(7q)                  |
|                        |                 |              |      |          |      |         |      | del(5q)                  |
|                        |                 |              |      |          |      |         |      | -7 9pUPD-9q              |
|                        |                 |              |      |          |      |         |      | +21                      |
|                        |                 |              |      |          |      |         |      | der(11q21) UPD21         |
|                        |                 |              |      |          |      |         |      | +21                      |
|                        |                 |              |      |          |      |         |      | -7                       |
|                        |                 |              |      |          |      |         |      | ND                       |
|                        |                 |              |      |          |      |         |      | +21                      |
|                        |                 |              |      |          |      |         |      | 12q UPD +21q             |
|                        |                 |              |      |          |      |         |      | der(1;7)                 |
|                        |                 |              |      |          |      |         |      | inv(9)(p12q13)           |
|                        |                 |              |      |          |      |         |      | del(11q32)-Y             |
|                        |                 |              |      |          |      |         |      | inv(9)(p12q13)           |

## Supplemental Figure 12

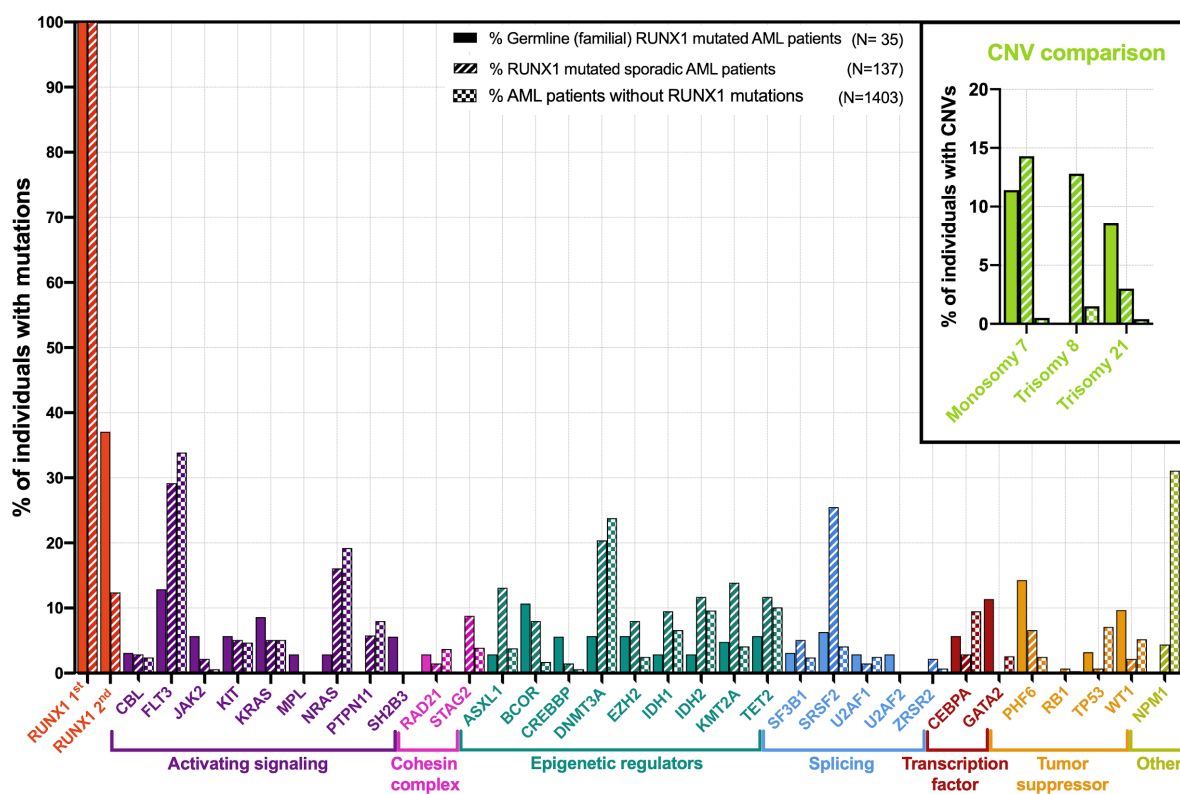

## Supplemental Figure Legends

### Supplemental Figure 1. Identification of a Novel *RUNX1* deletion in Family 1

**A.** SNP arrays were used to detect a large deletion in the 21q22.12 region. **B.** The breakpoints were determined by PCR amplification with primers 7432 and 7433 (7432–GCTCGTCCACCTTCAGACTC; 7433 – GGCTACAGTAGGCTCAGACATTC) on DNA derived from peripheral blood mononuclear cells of proband resulting in a product of ~4 kb. Sanger sequencing of the PCR product identified a deleted region of 727,595 bp from 36,319,974 to 37,047,568 (GRCh37/hg19; Chr21) leading to the removal of the promoter (P1), 5' untranslated region (UTR) and exon 1-2 for *RUNX1* (NM\_001754). Exon numbering is per LRG annotations for *RUNX1c*. Exons 4a and 8a indicate exons in *RUNX1a/RUNX1b* as marked that are overlapping with *RUNX1c* but not identical. **C.** Heritability of the *RUNX1* deletion was confirmed through PCR amplification across the *RUNX1* deletion with primers 7432 and 7433 on DNA

derived from peripheral blood mononuclear cells for proband (lane 1) and from hair follicles for her father and sister (lane 2 and 3, respectively). A 4 kb product indicates deletion carrier. No template control (lane 4). M, 1 kb marker.

**Supplemental Figure 2. Identification of a novel *RUNXI* deletion in Family 2.** **A.** Identification of deletion of *RUNXI* exons 2, 3 and 4 (NM\_001754) in patient III-1 using MLPA. Of the control genes, *PRDX4* and *OCRL* are on ChrX and *SRY* on ChrY. **B.** Deletion breakpoints defined by PCR amplification with primers 5146 and 5153 (5146 - AGGAAATGCAGTGAGAGAAACCAC; 5153 - CCCTTGGAATCCATCAGA) on germline DNA from individual III-3 yielding a product of size 1,322 bp rather than the expected 49,088 bp. Sequence analysis defined a 47,766 bp deletion from 36,298,116 to 36,250,351 (GRCh37/hg19 Assembly; Chr21) inclusive, removing Exon 3, 4 and 5 for NM\_001754 (*RUNX1c*) and the promoter (P2), exon 4a and 5 for *RUNX1a/b*. Exon numbering is per LRG annotations for *RUNX1c*. Exons 4a and 8a indicate exons in *RUNX1a/b* as marked that are overlapping with *RUNX1c* but not identical.

**Supplemental Figure 3. Family 3 Supplemental information (Individual III-3).** **A.** MLPA analysis of *RUNXI* exons with *CEBPA*, *CEBPB* and autosomal and sex chromosome control genes shows somatic amplification of the entire *RUNXI* gene in BMMNC from patient III-3 (red bars), relative to controls **B.** Determination of the numbers of cloned *RUNXI* PCR products amplified from buccal swab DNA revealed the expected 50% for a germline mutation. **C.** A novel p.Pro203Arg somatic mutation is seen at 29% in cloned *RUNXI* PCR products amplified from BMMNC.

**Supplemental Figure 4. Family 4 Supplemental Information.** **A.** Sanger confirmation of germline and somatic *RUNXI* mutations in individual II-3. **B.** other mutations found at this site in *RUNXI* from somatic sources. **C.** Luciferase assay (see supplementary methods) showing reduced GATA2 activity of potentially modifying variants in GATA2.

**Supplemental Figure 5. Family 5 Supplemental information.** Sanger confirmation of the germline (inherited) c.593A>T;D198V *RUNXI* mutation in Individual II-2 (PBMNC)

**Supplemental Figure 6. Family 6 supplemental information.** **A.** Sanger confirmation of the c.596G>A *RUNX1* G199E germline mutation in individual III-1. **B.** location of G199 within a DNA binding region of *RUNX1*.

**Supplemental Figure 7. Extended analysis on tumour-normal WES of Individual III-2 from Family 7.** **A.** Analysis of matched tumour-normal (saliva) WES using Sequenza combined VAF and copy number analysis. Changes were observed with duplication of chromosome 6 (trisomy) and chromosome 21 copy number neutral loss of heterozygosity (CN-LOH) specific to the tumour. **B.** visualisation of the inherited *RUNXI* mutation using IGV. The differential VAF of the mutation in tumour (88%) compared to normal (53%), indicates that somatic CN-LOH of chromosome 21 in tumour has duplicated the *RUNXI* mutated chromosome.

**Supplemental Figure 8. Relatedness analysis of families 8 and 9 who share the same RUNXI R320\* germline mutation.** **A.** Scatterplots showing coefficient of relatedness (Y-axis) based on number of SNPs with zero shared alleles (X-axis) for each paired sample. Parent-offspring (squares), unrelated pairs (circles) are represented as clusters on the scatterplot. **(B-C).** Runs of homozygosity from multiple individuals sharing the *RUNXI* genotype across all chromosomes **(B)** or chromosome 21 **(C)**. Lines and shaded boxes highlight runs of homozygosity (RoH) predicted by BCFtools (Narasimhan et al., 2016) in exome data. RoH can infer regions of autozygosity, chromosomal segments identical by descent, among the samples tested. Karyograms were generated using the autoplot function from ggbio (Yin et al., 2012) and RoH with high confidence (phred score = 20). Ideograms were generated using karyoploteR and RoH (Gel, B & Serra, E 2017). Family 9 (IV-1) had no RoH across chromosome 21, therefore is not represented in (B).

**Supplemental Figure 9. Family 10 supplemental information.** **A.** WES analysis of the proband (II-2) and parents (I-1 and I-2) of Family 10 revealed the germline c.968-10C>A variant in the proband (II-2) in both hair and blood samples which was confirmed by Sanger sequencing. WES analysis of the father's blood showed the variant at 2% allele load which was not detectable via sanger sequencing. **B.** Scatterplots showing coefficient of relatedness (Y-axis) based on number of SNPs with zero shared alleles (X-axis) for each paired sample. Parent-offspring (squares) and unrelated pairs are represented as clusters on the scatterplot. Relatedness between samples from Pedigree 10 with *RUNXI* genotype, confirms parentage and *de novo* status of the *RUNXI* c.968-10C>A variant **C.** RNA studies of the proband (RT-PCR), identified missplicing associated with the germline variant leading to RNA encoding a truncated protein (p.Ala324Leufs\*7).

**Supplemental Figure 10. Oncoplot of somatic mutations identified in the available samples of the families reported in this study.** Samples are grouped by disease status; 4 pre-leukemic individuals are separated from the 11 patient samples with myeloid malignancies and one sample with T-cell Non-Hodgkin's Lymphoma (T-NHL). Further abbreviations used: AML = Acute Myeloid Leukemia; CLL = Chronic lymphocytic Leukemia; CNV = Copy Number Variant; MDS = Myelodysplastic Syndrome; MPN = Myeloproliferative Neoplasm.

**Supplemental Figure 11. Oncoplot of somatic mutations of the samples in this study (supplementary figure 10) combined with other published somatic mutations in individuals with germline *RUNX1* mutations.** Samples are grouped based on disease phenotypes: The first group contains 23 pre-leukemic samples, the second group 45 samples with myeloid malignancies (AML, MDS and MPN), and the last group of 4 includes 3 T-ALL samples and 1 T-NHL. Variant percentages were calculated based on the number of samples for which that gene was analysed in case of gene panels. Reference numbers match main reference list for relevant published study. New data from the families described in this study are indicated with \*. Abbreviations used: AML = Acute Myeloid Leukemia; CLL = Chronic lymphocytic Leukemia; CNV = Copy Number Variant; MDS = Myelodysplastic Syndrome; MPN = Myeloproliferative Neoplasm; T-ALL = T-cell Acute Lymphoblastic Leukemia; T-NHL = T-cell Non Hodgkin's Lymphoma.

**Supplemental Figure 12.** Side by side comparison of somatic mutations and copy number variants reported in 3 groups based on their *RUNX1* mutation. **1** AML patients with germline *RUNX1* mutations (N=35) **2** AML patients with somatic *RUNX1* mutations (N=137) and **3** AML patients without *RUNX1* mutations (N=1403).

### **Supplemental Clinical Information**

**Family 1, (Figure 1A)** is a family with a proband diagnosed with MDS (RAEB-2) at 21 years of age. Her father suffered from thrombocytopenia and there was a family history of AML in the sister and niece of the proband's father. SNP microarray identified a deletion at the *RUNX1* locus (also confirmed by both MLPA and copy number assessment of WES Supplemental Figure 1B,C). PCR and Sanger sequencing identified the breakpoints of the 727,585bp deletion that removes the P1 promoter and exons 1 and 2 of the *RUNX1c* isoform (Supplemental Figure 1B). This deletion was present in both the affected father and daughter but not in the asymptomatic sister (Supplemental Figure 1C).

**Family 2 (Figure 1B)** is a four-generation family of Caucasian background. The proband (II-1) was diagnosed with thrombocytopenia in her 40s and was subsequently diagnosed with breast cancer at age 64, and MDS at age 65 that progressed to AML (age 74). Her son (III-1) also had thrombocytopenia and developed MDS/AML at the age of 49 years. One daughter (III-3) developed breast cancer at age 42, without haematological abnormalities; another daughter (III-4) has thrombocytopenia. Analysis of the DNA from III-1 by MLPA and SNP microarray identified a novel 47,766 bp deletion in *RUNX1* which removes exon 3, 4 and 5 of the RUNX1c isoform (Supplemental Figure 2). His mother (II-1 the proband) and her thrombocytopenic daughter (III-4) were also found to carry the deletion. This deletion predicts altered splicing of exon 1 to exon 5 which would result in an in-frame p.E20-G170 deletion removing almost the entire runt homology domain (RHD) for variant 1 (i.e. NP\_001745; isoform c), thereby preventing DNA binding, while retaining the transactivation domain (TAD).

**Family 3 (Figure 1C)** consists of seven affected individuals of whom four were thrombocytopenic and five had leukemia; two with thrombocytopenia developed AML. The proband (III-3) suffered from a seizure disorder and thrombocytopenia ( $100 \times 10^9/L$ ) since adolescence. At the age of 49 years, her platelets dropped to  $10 \times 10^9/L$ , she was diagnosed with MDS with trisomy 21 and underwent allogeneic bone marrow transplant from her HLA-matched sister (III-2). Her son (IV-5) had thrombocytopenia from birth and died from AML at the age of three years. Her nephew (IV-2) also presented with thrombocytopenia from birth and later developed AML with acquired trisomy 1. Sanger sequencing of *RUNX1* in the proband identified a novel germline heterozygous single nucleotide deletion (c.415delC; 50% VAF in buccal DNA, Supplemental Figure 3B), which leads to a frameshift p.L112fs\*9 and premature termination after amino acid 120. This results in a truncated protein lacking most of the RHD and the entire TAD.

**Family 4 (Figure 1D)** consists of one affected parent and four affected siblings. The proband (II-4), was found to be thrombocytopenic at age 38 and was subsequently diagnosed with AML (FAB M2) with a normal karyotype. She was initially treated successfully with induction chemotherapy but relapsed and subsequently received a bone marrow transplant from her HLA-identical brother (II-1), who was reported to be thrombocytopenic. In addition to II-1, two other siblings were also reported to be thrombocytopenic, with one also developing AML (II-3). The proband's mother (I-2) had also been diagnosed with AML in her 40s, from which she died. Sanger sequencing identified a germline heterozygous single nucleotide substitution *RUNX1* (c.506G>T), leading to a missense p.R169I mutation. Recurrent somatic missense and frameshift mutations are found at this residue p.R169 in both MDS/AML and Breast carcinoma (Supplemental Figure 4B) but this



is the first description of a germline alteration at this position leading to FPD-MM. The mutation was identified in all four siblings with thrombocytopenia and/or AML, (including the sibling that acted as a BMT donor) and was absent from II-2 who was unaffected.

**Family 5 (Figure 1E)** has 4 generations reported to have a constitutional bleeding disorder with thrombocytopenia and abnormal platelets. The proband (II-2), in addition to his constitutional thrombocytopenia, developed JAK2-V617F positive MPN at the age of 62 as well as a lymphoproliferative disorder at age 63. The son of the proband (III-1) developed an acute myelomonocytic leukaemia at the age of 12 years, from which he died. Sequencing of DNA from the proband identified a heterozygous c.593A>T substitution in *RUNXI* that leads to a missense p.D198V mutation (Figure 1E, Supplemental Figure 5). The thrombocytopenic daughter of the proband (III-2) was also a carrier of the variant.

**Family 6 (Figure 1F)** is a three generation family, with a history of thrombocytopenia and early onset AML. The proband (III-1) presented with thrombocytopenia at 2 months of age and genetic investigation identified a c.596G>A; p.Gly199Glu variant in *RUNX1*, which was also shared by the father and likely associated with the early age of AML onset with the grandmother (I-II), although not able to be confirmed. This variant has been reported previously in the context of inherited thrombocytopenia but not associated with a family history of leukemia.<sup>7</sup>

**Family 7 (Figure 1G)**, is a complex family with thrombocytopenia, multiple cases of MDS and AML as well as a case of T-ALL. The proband (III-2), had suffered from thrombocytopenia since childhood, but at the age of 28 developed symptoms of acute leukemia within days, with no documented pre-leukemic or MDS phase. The acute undifferentiated leukaemia was FLT3-ITD positive with trisomy 6 in tumour cells. She was treated with a MUD-SCT and is currently well. The sister, father and uncle of the proband all developed acute leukemia and were also treated with MUD-SCT. The father who suffered MDS/AML, as well as a psoriatic skin condition is currently well. The sister (III-1), was diagnosed with ALL aged 22, and developed therapy related MDS which progressed to AML. She received two SCT from the same matched unrelated donor (MUD), but died from treatment related mortality (aged 25). The uncle (II-2) who also developed AML, was treated with MUD-SCT and also died from treatment related mortality. Molecular analysis of material from the proband identified a *RUNXI* single nucleotide substitution (c.611G>T), leading to a p.R204Q missense variant. Further screening identified that all four affected family members were carriers of this mutation (Figure 1G). The germline mutation affecting p.R204 (Family 7) is located in the RUNT domain. Somatic mutations (including somatic R204Q) have frequently been

reported in AML.

**Family 8 (Figure 1H)**, is a family with a history of both solid tumor and hematological malignancies. The father of the proband suffered from long standing thrombocytopenia that progressed to MDS (RAEB-1) at age 58. At this time cytogenetics showed an unbalanced translocation (der(1;7)(q10;p10)) resulting in trisomy of 1q and monosomy of 7q. Subsequently his platelets dropped to almost undetectable levels and he passed away due to bleeding complications at age 58. At this time, the proband was also diagnosed with thrombocytopenia and sequencing of a 29 gene myeloid NGS panel revealed a germline *RUNX1* p.R320\* variant in DNA of the proband III-1 and father II-1. (Figure 1H).

**Family 9 (Figure 1I)** is a large family with a 4 generation history including a complex range of haematological malignancies, solid tumours and a prevalent psoriatic skin disorder. The proband of this family (IV-1), which is not known to be related to Family 8 (Supplemental Figure 8), had thrombocytopenia and was diagnosed with MDS, with dysplastic erythropoiesis and monosomy 7, at age 54. Within 3 months this rapidly progressed to AML with 24% myeloblasts and a platelet count of 13,000. She was treated with induction chemotherapy and MUD SCT but relapsed with the original monosomy 7 disease two years later and passed away due to complications from a second MUD SCT. Her sibling (IV-2) and mother (III-1) also had diagnoses of AML. The proband (IV-1) and her brother (IV-2) were both found to be carriers of a germline *RUNX1* c.958C>T; p.R320\* variant. Individual V-5 was found to carry the same *RUNX1* variant and by extension conferred obligate carrier status on both the father (IV-5) and the grandmother of V-5 (III-3). Other second cousins of the proband that carry the *RUNX1* variant (IV-7, IV-8), have had long standing mild thrombocytopenia, but have no reported hematological malignancies in themselves, a child (V-7) or their mother (III-5) who are also either obligate carriers or known carriers of the *RUNX1* c.958C>T; p.R320\* variant. Of these carriers, the child (V-7) was diagnosed with ALL at age 31. In contrast to multiple cases of AML observed in the proband and first-degree relatives, a second cousin of the proband (IV-5) was diagnosed with non-Hodgkin lymphoma at age 38 and ALL at age 41 and his daughter (V-5) T-ALL at age 3. Both were carriers of the same *RUNX1* c.958C>T; p.R320\* variant.

**Family 10 (Figure 1J)** was recruited due to a proband with a personal history of thrombocytopenia and T-NHL. He had no ancestral family history of thrombocytopenia or haematological malignancies; however both daughters were also thrombocytopenic suggesting an inherited condition. Upon diagnosis of T-cell Non-Hodgkin's Lymphoma (T-NHL) at age 30, the proband

underwent chemotherapy with supportive autologous stem cell transplant. Investigations 9 months later revealed massive hepatosplenomegaly and accordingly a splenectomy was performed. Persistent thrombocytopenia seen in bone marrow aspirate and trephine post-splenectomy indicated a concern for evolving therapy related MDS (tMDS) and this was confirmed approximately 8 months later following bone marrow biopsy, with 6% blasts seen along with cytogenetic abnormalities (46,XY,del(20)(q11.2q13.1)/47,indem,+1,del(1)(p32)). Induction chemotherapy and MUD SCT was performed soon after to treat the tMDS and results indicated hematologic and cytogenetic remission. WES on blood from the proband identified a *RUNXI* c.968-10C>A variant with a predicted effect on splicing, that was confirmed by RNA studies to generate a transcript that encodes a frameshift RUNX1 protein, p.Ala324Leufs\*7. Consistent with the family phenotypes, Sanger sequencing showed that both daughters but neither parent were carriers of the variant, suggesting it was *de novo* in the proband. Peddy analysis of WES of the parents confirmed parentage,<sup>11</sup> and additionally WES identified 2 *RUNXI* variant reads in the blood of the father suggesting that he may be a mosaic carrier of the mutation.

## **Supplemental Methods**

### **Ethics**

Clinical information and samples were collected with informed consent from all subjects and approval through institutional human ethics review board-approved protocols from the Australian Familial Haematological Cancer Study (AFHCS) (Royal Adelaide Hospital (RAH) #091203 and #100702, and Children, Youth and Women's Health Service #REC1542/12/12, Adelaide, South Australia, Australia), and conducted in accordance with the Declaration of Helsinki. Ethics for families identified through non-Australian co-authors were held by the local diagnosing center.

### **DNA isolation, Oligonucleotides, PCR and Sanger sequencing**

DNA was isolated using the Qiagen DNA mini kit according to the supplied protocol. The primers for the coding regions of all exons of *RUNXI* were used for PCR amplification and Sanger sequencing as previously described.<sup>1</sup>

### **Multiplex ligation-dependent probe amplification (MLPA) analysis**

All reagents for MLPA were purchased from MRC-Holland with the exception of the oligonucleotides (Sigma). The reaction was carried out as described.<sup>2</sup> Products were separated by capillary electrophoresis on an ABI 3730 (Applied Biosystems). Data was analysed as described,<sup>2</sup> and a ratio of 0.8 to 1.2 was taken as representative of two copies of the exon present.

### **SNP array copy number analysis**

SNP array copy number analysis was performed using a high density SNP array (Illumina 850K assay chip) as previously described.<sup>3</sup>

### **Relatedness and haplotype analysis**

Genetic relatedness testing was performed on WES data from individuals to compare Families 8 and 9, as well as confirm relationships between individuals in Family 10. Relatedness plots were generated from Peddy,<sup>4</sup> using a VCF and associated PED file. For WES samples from individuals in Families 8 and 9, runs of homozygosity (RoH) on chromosome 21 were predicted by BCFtools,<sup>5</sup> in exome data. RoH can infer regions of autozygosity, chromosomal segments identical by descent, among the samples tested. Karyograms were generated using the autoplot function from ggbio<sup>6</sup> and RoH with high confidence (phred score = 20). Ideograms were generated using karyoploteR and RoH (Gel, B & Serra, E 2017).<sup>7</sup> Family 9 (IV-1) had no RoH across chromosome 21, therefore is not represented in (B).

### **Identification of potential germline modifier mutations in FPD-MM.**

In addition to characterisation of the causative germline RUNX1 mutation in our families, we also explored germline variants in other relevant genes associated with leukaemia development, that could potentially act as phenotype modifiers in combination with the germline RUNX1 mutation.<sup>8</sup> To identify potential modifier variants the following filtering was performed: VAF of the variant greater than 40%, population MAF in gnomAD is less than 5% (based on carrier/allele frequencies of damaging alleles in autosomal recessive disorders per ACMG guidelines),<sup>9,10</sup> a sequence variant predicted to change the amino acid sequence of the protein. This was applied to all genes if sequence data was from the myeloid panel and for WES a gene list filter, with all genes known to be mutated in FPD-MM tumors was applied (See supplemental Figure 11).

### **Aggregation of FPD-MM associated germline and somatic mutations from the literature**

We collated germline *RUNX1* variants from the literature and where possible converted all variants to current LRG *RUNX1* nomenclature. Information on malignancy and HM phenotype was also collated. For studies reporting somatic mutations, we used the information as reported (gene level, not all studies reported variant level) and collated phenotype and age of HM diagnosis. Reference numbers for studies with somatic mutations are shown per sample in Figure 3 and Supplemental Figure 11.

### **Comparing familial *RUNX1* to somatic *RUNX1* mutation positive AML cases**

In addition to the 8 AML patients from our families (figure 1, supplementary table 2) , we have further analysed 27 patients with *RUNX1* germline mutations that have been reported to develop AML (Figure 3 (oncoplex)). Somatic variants of this combined group of 35 patients with familial AML was compared to 137 published sporadic AML patients that had at least 1 *RUNX1* mutation revealed the difference in somatic signature between these cohorts.<sup>11</sup> The somatic CN-LOH detected in 3 of our germline *RUNX1* cases were excluded from analysis since CN-LOH was not reported in the sporadic AML dataset.

### **Luciferase assays for GATA2 WT and mutant proteins**

The luciferase assays for *GATA2* WT or mutants (among which P161A) were performed as described previously.<sup>12</sup> In brief, expression plasmids were co-transfected into Cos-7 cells, combined with a LUC reporter construct driven by a *LYL1* promoter. After 20 hours, the cells were harvested and measured using a Dual-Luciferase Reporter Assay System (Promega).<sup>13</sup> In Supplemental Figure 4C, we show the fold increase in normalized luciferase activity of *GATA2* WT and mutant proteins on *LYL1* promoter expression. \*  $p < 0.05$  (Fisher's exact test)

### **Supplemental references**

1. Michaud J, Wu F, Osato M, et al. In vitro analyses of known and novel *RUNX1*/*AML1* mutations in dominant familial platelet disorder with predisposition to acute myelogenous leukemia: Implications for mechanisms of pathogenesis. *Blood*. 2002;99(4):1364–1372.
2. White SJ, Breuning MH, den Dunnen JT. Detecting copy number changes in genomic DNA: MAPH and MLPA. *Methods Cell Biol*. 2004;75:751–768.
3. Cheah JJC, Brown AL, Schreiber AW, et al. A novel germline *SAMD9L* mutation in a family with ataxia-pancytopenia syndrome and pediatric acute lymphoblastic leukemia. *Haematologica*. 2019;104(7):e318–e321.

4. Pedersen BS, Quinlan AR. Who's Who? Detecting and Resolving Sample Anomalies in Human DNA Sequencing Studies with Peddy. *Am. J. Hum. Genet.* 2017;100(3):406–413.
5. Narasimhan V, Danecek P, Scally A, et al. BCFtools/RoH: a hidden Markov model approach for detecting autozygosity from next-generation sequencing data. *Bioinformatics.* 2016;32(11):1749–1751.
6. Yin T, Cook D, Lawrence M. ggbio: an R package for extending the grammar of graphics for genomic data. *Genome Biol.* 2012;13(8):R77.
7. Gel B, Serra E. karyoploteR: an R/Bioconductor package to plot customizable genomes displaying arbitrary data. *Bioinformatics.* 2017;33(19):3088–3090.
8. Deltas C. Digenic inheritance and genetic modifiers. *Clin. Genet.* 2018;93(3):429–438.
9. Richards S, Aziz N, Bale S, et al. Standards and guidelines for the interpretation of sequence variants: a joint consensus recommendation of the American College of Medical Genetics and Genomics and the Association for Molecular Pathology. *Genet. Med.* 2015;17(5):405–424.
10. Lek M, Karczewski KJ, Minikel EV, et al. Analysis of protein-coding genetic variation in 60,706 humans. *Nature.* 2016;536(7616):285–291.
11. Papaemmanuil E, Gerstung M, Bullinger L, et al. Genomic Classification and Prognosis in Acute Myeloid Leukemia. *N. Engl. J. Med.* 2016;374(23):2209–2221.
12. Chong CE, Venugopal P, Stokes PH, et al. Differential effects on gene transcription and hematopoietic differentiation correlate with GATA2 mutant disease phenotypes. *Leukemia.* 2018;32(1):194–202.
13. Hahn CN, Chong C-E, Carmichael CL, et al. Heritable GATA2 mutations associated with familial myelodysplastic syndrome and acute myeloid leukemia. *Nat. Genet.* 2011;43(10):1012–1017.

**Supplemental Table 1 - Published germline *RUNX1* mutations – 130 annotated families**

| NM_001754.4 1c | NP_001745.2  | gnomAD (%) | No. of families | mutation type | HM type, nd= not determined, na= not applicable (no HM) | References*                                                                                                                                                                                   |
|----------------|--------------|------------|-----------------|---------------|---------------------------------------------------------|-----------------------------------------------------------------------------------------------------------------------------------------------------------------------------------------------|
| c.97G>A        | p.D33N       | 0          | 1               | missense      | na                                                      | Johnson 2016 <sup>17</sup>                                                                                                                                                                    |
| c.163dup       | p.A55Gfs*83  | 0          | 1               | frameshift    | MDS/AML/DLBCL/SCC                                       | Owen 2008 <sup>21</sup>                                                                                                                                                                       |
| c.171_198dup   | p.L67Afs*80  | 0          | 1               | frameshift    | MDS                                                     | Pastor 2017 <sup>22</sup>                                                                                                                                                                     |
| c.308dup       | p.T104Yfs*34 | 0          | 1               | frameshift    | na                                                      | Kanagal-Shamanna 2017 <sup>8</sup>                                                                                                                                                            |
| c.317G>A       | p.W106*      | 0          | 1               | stopgain      | na                                                      | Stockley 2013 <sup>23</sup> , Johnson 2016 <sup>17</sup>                                                                                                                                      |
| c.320G>A       | p.R107H      | 0          | 1               | missense      | AML                                                     | Latger-Cannard 2016 <sup>24</sup>                                                                                                                                                             |
| c.328A>G       | p.K110E      | 0          | 1               | missense      | AML                                                     | Michaud 2002 <sup>25</sup>                                                                                                                                                                    |
| nd             | p.K110Q      | 0          | 1               | missense      | AML                                                     | Simon 2017 <sup>26</sup>                                                                                                                                                                      |
| c.334delC      | p.L112Cfs*10 | 0          | 1               | frameshift    | MDS/AML                                                 | This study                                                                                                                                                                                    |
| c.351+1G>A     |              | 0          | 1               | splicing      | MDS/AML                                                 | Owen 2008 <sup>21</sup>                                                                                                                                                                       |
| c.351+1G>T     |              | 0          | 5               | splicing      | na                                                      | Stockley 2013 <sup>23</sup> , Johnson 2016 <sup>17</sup> , De Rocco 2017 <sup>27</sup> , Perez- Botero 2017 <sup>28</sup>                                                                     |
| c.352-1G>T     | p.V118Gfs*11 | 0          | 1               | splicing      | AML                                                     | Song 1999 <sup>2</sup>                                                                                                                                                                        |
| c.352-1G>A     | p.V118Gfs*11 | 0          | 3               | splicing      | Na/MDS/AML                                              | Sun 2004 <sup>29</sup> , Ouchi-Uchiyama 2015 <sup>30</sup> , Guidugli 2017 <sup>31</sup>                                                                                                      |
| c.367G>C       | p.D123H      | 0          | 1               | missense      | MDS/AML                                                 | Owen 2008 <sup>21</sup>                                                                                                                                                                       |
| c.400G>C       | p.A134P      | 0          | 1               | missense      | AML                                                     | Walker 2002 <sup>32</sup>                                                                                                                                                                     |
| nd             | p.G135V      | 0          | 2               | missense      | T-ALL                                                   | Antony-Debre 2016 <sup>5</sup>                                                                                                                                                                |
| nd             | p.S141A      | 0.0007     | 1               | missense      | AML                                                     | Simon 2017 <sup>26</sup>                                                                                                                                                                      |
| c.425C>A       | p.A142D      | 0          | 1               | missense      | MDS                                                     | Schwartz 2017 <sup>33</sup>                                                                                                                                                                   |
| c.442_449del   | p.T148Hfs*9  | 0          | 1               | frameshift    | AML                                                     | Beri-Dexheimer 2008 <sup>34</sup> , Latger-Cannard 2016 <sup>24</sup> , Antony-Debre 2016 <sup>5</sup>                                                                                        |
| c.460del       | p.Q154Rfs*22 | 0          | 1               | frameshift    | NHL                                                     | Marneth 2017 <sup>35</sup>                                                                                                                                                                    |
| c.467C>A       | p.A156E      | 0          | 1               | missense      | AML                                                     | Preudhomme 2009 <sup>18</sup> , Latger-Cannard 2016 <sup>24</sup>                                                                                                                             |
| c.508+3delA    | p.R162fs     | 0          | 1               | frameshift    | AML                                                     | Michaud 2002 <sup>25</sup>                                                                                                                                                                    |
| nd             | p.R166Q      | 0          | 2               | missense      | MDS                                                     | Song 1999 <sup>2</sup> , Ouchi-Uchiyama 2015 <sup>30</sup>                                                                                                                                    |
| c.496C>T       | p.R166*      | 0          | 3               | stopgain      | AML                                                     | DiNardo 2016 <sup>36</sup> , Kanagal-Shamanna 2017 <sup>8</sup> , Bluteau 2011 <sup>37</sup> , Latger-Cannard 2016 <sup>24</sup> , Antony-Debre 2016 <sup>5</sup> , Haslam 2015 <sup>38</sup> |
| c.500G>A       | p.S167N      | 0          | 2               | missense      | na                                                      | Obata 2015 <sup>39</sup> , Yoshimi 2014 <sup>7</sup>                                                                                                                                          |
| nd             | p.S167N      | 0          | 1               | missense      | MDS/AML                                                 | Yoshimi 2014 <sup>7</sup>                                                                                                                                                                     |
| c.506G>T       | p.R169I      | 0          | 1               | missense      | AML                                                     | This study                                                                                                                                                                                    |
| nd             | p.G143W      | 0          | 1               | missense      | MDS/AML                                                 | Sakurai 2016 <sup>40</sup> , Chin 2016 <sup>41</sup>                                                                                                                                          |
| nd             | p.G170fs     | 0          | 1               | frameshift    | AML                                                     | Antony-Debre 2016 <sup>5</sup>                                                                                                                                                                |
| c.508G>A       | p.G170R      | 0          | 1               | missense      | MDS/AML                                                 | Buijs 2012 <sup>42</sup>                                                                                                                                                                      |
| c.508+1G>T     | nd           | 0          | 2               | splicing      | na                                                      | Stockley 2013 <sup>23</sup> , Johnson 2016 <sup>17</sup>                                                                                                                                      |
| nd             | p.S172G      | 0          | 1               | missense      | AML                                                     | Simon 2017 <sup>26</sup>                                                                                                                                                                      |
| c.554_560del   | p.Q185Pfs*24 | 0          | 1               | frameshift    | AML                                                     | Ng 2018 <sup>43</sup>                                                                                                                                                                         |
| c.557T>A       | p.V186D      | 0          | 1               | missense      | BMF                                                     | Guidugli 2017 <sup>31</sup>                                                                                                                                                                   |
| c.567C>G       | p.Y189*      | 0          | 2               | stopgain      | MDS                                                     | Zhang 2015 <sup>44</sup> , Chisholm 2019 <sup>45</sup>                                                                                                                                        |
| c.578T>A       | p.I193N      | 0          | 1               | missense      | na                                                      | De Rocco 2017 <sup>27 26</sup>                                                                                                                                                                |
| c.582A>C       | p.K194N      | 0          | 1               | missense      | MDS/NHL                                                 | DiNardo 2016 <sup>36</sup> , Kanagal-Shamanna 2017 <sup>8</sup>                                                                                                                               |
| c.583dup       | p.I195Nfs*18 | 0          | 1               | frameshift    | na                                                      | Badin 2017 <sup>46</sup>                                                                                                                                                                      |
| c.587C>G       | p.T196R      | 0          | 1               | missense      | MDS/AML                                                 | Antony-Debre 2016 <sup>5</sup> , Latger-Cannard 2016 <sup>24</sup>                                                                                                                            |
| nd             | p.T196fs     | 0          | 1               | frameshift    | MDS/AML                                                 | Langabeer 2010 <sup>48</sup>                                                                                                                                                                  |

|                  |                |        |   |             |                  |                                                                                                                                                                            |
|------------------|----------------|--------|---|-------------|------------------|----------------------------------------------------------------------------------------------------------------------------------------------------------------------------|
| c.586A>G         | p.T196A        | 0      | 1 | missense    | na               | Johnson 2016 <sup>17</sup>                                                                                                                                                 |
| nd               | p.D198Y        | 0      | 1 | missense    | MDS/AML          | Buijs 2001 <sup>49</sup>                                                                                                                                                   |
| c.593A>T         | p.D198V        | 0      | 2 | missense    | AML/MPN/CLL/SLL  | Johnson 2016 <sup>17</sup> , This study                                                                                                                                    |
| c.592G>A         | p.D198N        | 0      | 1 | missense    | na               | Ouchi-Uchiyama 2015 <sup>30</sup>                                                                                                                                          |
| c.596G>A         | p.G199E        | 0      | 2 | missense    | na/AML           | Yoshimi 2014 <sup>7</sup> , Sakurai 2016 <sup>40</sup> , This study                                                                                                        |
| c.601C>T         | p.R201*        | 0      | 5 | stopgain    | AML              | Song 1999 <sup>2</sup> , Ripperger 2009 <sup>50</sup> , Yoshimi 2014 <sup>7</sup> , Nishimoto 2010 <sup>51</sup> , Tawana 2017 <sup>52</sup> , Chisholm 2019 <sup>45</sup> |
| c.602G>A         | p.R201Q        | 0      | 2 | missense    | AML              | Song 1999 <sup>2</sup> , Holme 2012 <sup>53</sup> , Bluteau 2011 <sup>37</sup> , Latger-Cannard 2016 <sup>24</sup> , Manchev 2017 <sup>47</sup>                            |
| c.601dup         | p.R201Pfs*12   | 0      | 1 | frameshift  | na               | Ouchi-Uchiyama 2015 <sup>30</sup>                                                                                                                                          |
| c.611G>A         | p.R204Q        | 0      | 3 | stopgain    | AML/T-ALL        | Preudhomme 2009 <sup>18</sup> , Antony-Debre 2016 <sup>5</sup> , Latger-Cannard 2016 <sup>24</sup> , Johnson 2016 <sup>17</sup> , This study                               |
| c.610C>T         | p.R204*        | 0      | 2 | stopgain    | AML              | Song 1999 <sup>2</sup> , Churpek 2015 <sup>6</sup>                                                                                                                         |
| c.649G>A         | p.G217R        | 0      | 1 | missense    | B-ALL            | Linden 2010 <sup>54</sup>                                                                                                                                                  |
| c.719delC        | p.P240Hfs*14   | 0      | 1 | frameshift  | MDS/AML/NHL      | DiNardo 2016 <sup>36</sup> , Kanagal-Shamanna 2017 <sup>8</sup>                                                                                                            |
| nd               | p.P245S        | 0      | 1 | missense    | na               | Antony-Debre 2016 <sup>5</sup>                                                                                                                                             |
| delC             | p.T246Rfs*8    | 0      | 1 | frameshift  | CMMoL, AML       | Heller 2005 <sup>55</sup> , Antony-Debre 2016                                                                                                                              |
| nd               | p.N260fs       | 0      | 1 | frameshift  | MDS/AML          | Sakurai 2016 <sup>40</sup>                                                                                                                                                 |
| c.784C>T         | p.Q262*        | 0      | 1 | stopgain    | MDS/AML          | Buijs 2012 <sup>42</sup>                                                                                                                                                   |
| c.788delC        | p.P263Lfs*48   | 0      | 1 | frameshift  | AML              | Appelmann 2009 <sup>56</sup>                                                                                                                                               |
| c.837G>A         | p.W279*        | 0      | 2 | stopgain    | MDS              | Schmit 2015 <sup>57</sup> , Churpek 2015 <sup>6</sup> , DiNardo 2016 <sup>36</sup> , Ok 2016 <sup>58</sup> , Kanagal-Shamanna 2017 <sup>8</sup>                            |
| nd               | p.Y287*        | 0      | 1 | stopgain    | MDS/AML          | Michaud 2002 <sup>25</sup> , Churpek 2015 <sup>6</sup> , Chisholm 2019 <sup>45</sup>                                                                                       |
| nd               | p.G289fs       | 0      | 1 | frameshift  | CMML/MDS         | Shiba 2012 <sup>59</sup> , Yoshimi 2014 <sup>7</sup>                                                                                                                       |
| c.866delG        | p.G289Dfs*22   | 0      | 1 | frameshift  | MDS/AML          | Kozubík 2018 <sup>60</sup>                                                                                                                                                 |
| c.967+2 5 del    | p.A297fs       | 0      | 1 | frameshift  | AML              | De Rocco 2017 <sup>27</sup>                                                                                                                                                |
| c.958C>T         | p.R320*        | 0      | 3 | stopgain    | MDS/AML          | Owen 2008 <sup>21</sup> , This study                                                                                                                                       |
| c.968-10C>A      | p.A324Lfs*7    | 0      | 1 | splicing    | T-NHL/tMDS       | This study                                                                                                                                                                 |
| c.987delG        | p.F330Sfs*264  | 0      | 1 | frameshift  | MF/MDS/AML       | Yoshimi 2014 <sup>7</sup>                                                                                                                                                  |
| nd               | p.D332Tfs*262  | 0      | 1 | frameshift  | AML              | Antony-Debre 2016 <sup>5</sup>                                                                                                                                             |
| c.999_1003dup    | p.Q335Rfs*261  | 0      | 1 | frameshift  | AML/T-ALL/CLL    | Preudhomme 2009 <sup>18</sup> , Latger-Cannard 2016 <sup>24</sup> , Antony-Debre 2016 <sup>5</sup>                                                                         |
| c.1088_1094del   | p.G363Afs*229  | 0      | 1 | frameshift  | MDS/AML/T-ALL    | Owen 2008 <sup>21</sup>                                                                                                                                                    |
| c.1092del        | p.I364Mfs*230  | 0      | 1 | frameshift  | na               | Latger-Cannard 2016 <sup>24</sup>                                                                                                                                          |
| c.1098_1103dup   | p.I366_G367dup | 0.01   | 1 | duplication | na               | DiNardo 2016 <sup>36</sup>                                                                                                                                                 |
| c.1160G>C        | p.G387A        | 0.0006 | 1 | missense    | MPN              | DiNardo 2016 <sup>36</sup>                                                                                                                                                 |
| c.1163C>A        | p.S388*        | 0      | 1 | stopgain    | MDS/AML          | Churpek 2010 <sup>61</sup> , Churpek 2015 <sup>6</sup>                                                                                                                     |
| c.1208_1322del   | Y403Cfs*153    | 0      | 1 | frameshift  | na               | Chisholm 2019 <sup>45 31</sup>                                                                                                                                             |
| nd               | p.H404Pfs*43   | 0      | 1 | frameshift  | AML              | Antony-Debre 2016 <sup>5</sup>                                                                                                                                             |
| nd               | p.Y414*        | 0      | 2 | stopgain    | MDS/AML          | Chisholm 2019 <sup>45</sup>                                                                                                                                                |
| nd               | p.N465K        | 0      | 1 | missense    | MDS              | Yoshimi 2016 <sup>62</sup>                                                                                                                                                 |
| c.1415T>C        | p.L472P        | 0.02   | 1 | missense    | AML/HCL          | Yoshimi 2014 <sup>7</sup> , Yoshimi 2016 <sup>62</sup>                                                                                                                     |
| c.1413_1414insGC | p.L472Afs*123  | 0      | 1 | frameshift  | AML/MDS/ALL      | Sorrell 2012 <sup>63</sup> , Churpek 2015 <sup>6</sup>                                                                                                                     |
| del P1 ex1-2     |                |        | 1 | deletion    | MDS              | This study                                                                                                                                                                 |
| del ex 1-2       |                |        | 1 | deletion    | AML/T-NHL        | Cavalcante de Andrade Silva 2018 <sup>64</sup>                                                                                                                             |
| del ex 1-2       |                |        | 1 | deletion    | BMF              | Guidugli 2017 <sup>31</sup>                                                                                                                                                |
| del ex 1-2       |                |        | 1 | deletion    | MDS/AML/lymphoma | Sakurai 2016 <sup>40</sup>                                                                                                                                                 |



|                   |               |  |   |               |                                |                                                                                                            |
|-------------------|---------------|--|---|---------------|--------------------------------|------------------------------------------------------------------------------------------------------------|
| del ex 1-6        |               |  | 1 | deletion      | AML                            | DiNardo 2016 <sup>36</sup> , Kanagal-Shamanna 2017 <sup>8</sup>                                            |
| del ex 3-9        |               |  | 1 | deletion      | AML/lymphoma/<br>lymphosarcoma | Song 1999 <sup>2</sup>                                                                                     |
| del ex 3-5        | p.E20-G170del |  | 1 | deletion      | MDS/AML/MPN/ALL                | This study                                                                                                 |
| del ex 6          |               |  | 1 | deletion      | MDS/AML                        | Jongmans 2010 <sup>65</sup>                                                                                |
| tandem dup ex 3-7 |               |  | 1 | duplication   | AML/NHL                        | Jongmans 2010 <sup>65</sup> , Marneth 2017 <sup>35</sup>                                                   |
| whole gene        |               |  | 1 | deletion      | na                             | Chisholm 2019 <sup>45</sup>                                                                                |
| whole gene        |               |  | 1 | deletion      | MDS/AML                        | Shinawi 2008 <sup>66</sup>                                                                                 |
| whole gene        |               |  | 1 | deletion      | AML                            | Preudhomme 2009 <sup>18</sup>                                                                              |
| whole gene        |               |  | 1 | deletion      | MDS                            | Van der crabben 2010 <sup>67</sup>                                                                         |
| whole gene        |               |  | 1 | deletion      | na                             | Hoyer 2007 <sup>68</sup>                                                                                   |
| whole gene        |               |  | 1 | deletion      | na                             | Beri-Dexheimer 2008 <sup>34</sup> , Antony-<br>Debre 2016 <sup>5</sup> , Latger-Cannard 2016 <sup>24</sup> |
| whole gene        |               |  | 1 | deletion      | na                             | Shinawi 2008 <sup>66</sup>                                                                                 |
| 1.81Mb deletion   |               |  | 1 | deletion      | na                             | Shinawi 2008 <sup>66</sup>                                                                                 |
| whole gene        |               |  | 1 | deletion      | na                             | Lyle 2009 <sup>69</sup>                                                                                    |
| whole gene        |               |  | 1 | deletion      | MDS                            | Pastor 2017 <sup>22</sup>                                                                                  |
| whole gene        |               |  | 1 | deletion      | RCC                            | Pastor 2017 <sup>22</sup>                                                                                  |
| 4.47 Mb deletion  |               |  | 1 | deletion      | na                             | Katzaki 2010 <sup>70</sup>                                                                                 |
| 2.9 Mb deletion   |               |  | 1 | deletion      | na                             | Katzaki 2010 <sup>70</sup>                                                                                 |
| 4.2 Mb deletion   |               |  | 1 | deletion      | na                             | Katzaki 2010 <sup>70</sup>                                                                                 |
| 2.16 Mb deletion  |               |  | 1 | deletion      | MDS/AML                        | Latger-Cannard 2016 <sup>24</sup>                                                                          |
| 2 Mb deletion     |               |  | 1 | deletion      | MDS/AML                        | Sakurai 2016 <sup>40</sup>                                                                                 |
| t(16;21)          |               |  | 1 | translocation | AML                            | Buijs 2012 <sup>42</sup>                                                                                   |

\*Refer to reference

list in main document for reference numbering shown here

Supplemental table 2

| Family   | Individual | Malignancy type | Sample type  | Sequencing type          | Germline/somatic | Gene name | cDNA change   | AA change      | VAF                              | GnomAD allele count | GnomAD % | CADD (V1.3)          | ClinVar              | Cosmic count |
|----------|------------|-----------------|--------------|--------------------------|------------------|-----------|---------------|----------------|----------------------------------|---------------------|----------|----------------------|----------------------|--------------|
| Family 1 | III-2      | MDS             | PBMNC        | WES                      | Germline         | RUNX1     | Δex1-2        | Δex1-2         | N/A                              | 0                   | 0        | N/A                  | N/A                  | N/A          |
|          |            |                 |              |                          | Somatic          | JAK2      | c.1849G>T     | p.V617F        | 38%                              | 97                  | 0.0344   | 33                   | 14 submissions (P)   | 41459        |
|          |            |                 |              |                          | Somatic          | SH2B3     | c.832delA     | p.K278fs       | 33%                              | 0                   | 0        | N/A                  | absent               | absent       |
|          |            |                 |              |                          | Somatic          | TET2      | c.1584C>A     | p.N528K        | 49%                              | 0                   | 0        | 4.7                  | absent               | absent       |
|          |            |                 |              |                          | Somatic          | PHF6      | c.820C>T      | p.R274*        | 54%                              | 0                   | 0        | 46                   | 1 submission (P)     | 14           |
| Family 2 | II-1       | MDS/AML         | PBMNC        | Gene panel               | Germline         | RUNX1     | Δex3-5        | Δex3-5         | N/A                              | N/A                 | N/A      | N/A                  | N/A                  | N/A          |
|          |            |                 |              |                          | Somatic          | U2AF1     | c.470A>G      | p.Q157R        | 41%                              | 6                   | 0.002    | 29.1                 | 1 submission (LP)    | 35           |
| Family 3 | III-3      | MDS             | Buccal/BMMNC | Sanger/ Gene panel/ MLPA | Germline         | RUNX1     | c.334delC     | p.L112Cfs*10   | 50% (buccal)<br>66% (tumor, +21) | 0                   | 0        | N/A                  | absent               | absent       |
|          |            |                 | BMMNC        | Sanger                   | Somatic          | RUNX1     | c.608C>G      | p.P203R        | 29%                              | 0                   | 0        | 31                   | absent               | absent       |
|          |            |                 | BMMNC        | Sanger                   | Unknown          | MEIS1     | c.490G>A      | p.E164K        | nd                               | 0                   | 0        | 28.3                 | absent               | 1            |
| Family 4 | II-1       | Pre             | PBMNC        | Gene panel               | Germline         | RUNX1     | c.506G>T      | p.R169I        | 42%                              | 0                   | 0        | 34                   | absent               | absent       |
|          |            |                 |              |                          | Germline         | RUNX1     | c.506G>T      | p.R169I        | 40%                              | 0                   | 0        | 34                   | absent               | absent       |
|          | II-3       | AML             | PBMNC        | Gene panel               | Germline         | ASXL1     | c.3306G>T     | p.E1102D       | 53%                              | 2754                | 0.97     | 23.5                 | 2 submissions (LB)   | 22           |
|          |            |                 |              |                          | Somatic          | RUNX1     | c.496C>G      | p.R166G        | 12%                              | 0                   | 0        | 27.4                 | absent               | 12           |
|          | II-4       | AML             | PBMNC        | Gene panel/ Sanger       | Germline         | RUNX1     | c.506G>T      | p.R169I        | 43%                              | 0                   | 0        | 34                   | absent               | absent       |
|          |            |                 |              |                          | Germline         | ASXL1     | c.3306G>T     | p.E1102D       | 50%                              | 2754                | 0.97     | 23.5                 | 2 submissions (LB)   | 22           |
| II-5     | Pre        | PBMNC           | Gene panel   | Germline                 | RUNX1            | c.506G>T  | p.R169I       | 44%            | 0                                | 0                   | 34       | absent               | absent               |              |
|          |            |                 |              | Germline                 | GATA2            | c.481C>G  | p.P161A       | 38%            | 2229                             | 0.82                | 17.3     | 5 submissions (B/LB) | 2                    |              |
| Family 5 | II-2       | MPN/CLL         | PBMNC        | Gene panel /Sanger       | Germline         | RUNX1     | c.593A>T      | p.D198V        | 53%                              | 0                   | 0        | 31                   | absent               | 5            |
|          |            |                 |              |                          | Germline         | CEBPA     | c.584_589dup  | p.H195_P196dup | 50%                              | 1206                | 3.25     | N/A                  | 2 submissions (B/LB) | 11           |
|          |            |                 |              |                          | Germline         | JAK2      | rs12340895 GG | n/a            | 50%                              | 7962                | 25.4     | N/A                  | absent               | absent       |
|          |            |                 |              |                          | Somatic          | JAK2      | c.1849G>T     | p.V617F        | 40%                              | 97                  | 0.03     | 33                   | 14 submissions (P)   | 41459        |
|          |            |                 |              |                          | Somatic          | DNMT3A    | c.1904G>A     | p.R635Q        | 43%                              | 0                   | 0        | 35                   | absent               | 4            |
|          | III-2      | Pre             | PBMNC        | gene panel               | Germline         | RUNX1     | c.593A>T      | p.D198V        | 51%                              | 0                   | 0        | 31                   | absent               | 5            |
|          |            |                 |              |                          | Somatic          | U2AF1     | c.122C>T      | p.T41M         | 25%                              | 0                   | 0        | 33                   | absent               | absent       |
| Family 6 | II-2       | Pre             | nd           | Sanger                   | Germline         | RUNX1     | c.596G>A      | p.G199E        | nd                               | 0                   | 0        | 33                   | absent               | absent       |
|          | III-1      | Pre             | nd           | Sanger                   | Germline         | RUNX1     | c.596G>A      | p.G199E        | nd                               | 0                   | 0        | 33                   | absent               | absent       |

**Supplemental table 2 (continued)**

| Family    | Individual      | Malignancy type | Sample type    | Sequencing type    | Germline/somatic | Gene name              | cDNA change  | AA change      | VAF                              | GnomAD allele count | GnomAD % | CADD (V1.3) | ClinVar                 | Cosmic count |
|-----------|-----------------|-----------------|----------------|--------------------|------------------|------------------------|--------------|----------------|----------------------------------|---------------------|----------|-------------|-------------------------|--------------|
| Family 7  | II-1            | MDS/AML         | nd             | nd                 | Germline         | RUNX1                  | c.611G>A     | p.R204Q        | nd                               | 0                   | 0        | 35          | 1 submission (P)        | 24           |
|           |                 |                 |                |                    | Somatic          | KMT2A                  | nd           | PTD            | nd                               | nd                  | nd       | N/A         |                         |              |
|           | II-2            | MDS/AML         | nd             | nd                 | Germline         | RUNX1                  | c.611G>A     | p.R204Q        | nd                               | 0                   | 0        | 35          | 1 submission (P)        | 24           |
|           |                 |                 |                |                    | Somatic          | NRAS                   | c.182A>G     | p.Q61R         | nd                               | 0                   | 0        | 23.1        | 25 submissions (P)      | 1,722        |
|           | III-2           | AML             | Tumor / saliva | WES                | Germline         | RUNX1                  | c.611G>A     | p.R204Q        | 50% (saliva) 88% (tumor, CN-LOH) | 0                   | 0        | 35          | 1 submission (P)        | 24           |
|           |                 |                 |                |                    | Somatic          | FLT3                   | nd           | ITD            | 19%                              | 0                   | 0        | N/A         | overlapping             | overlapping  |
|           |                 |                 |                |                    | Somatic          | BCOR                   | c.4074delC   | p.K1360fs      | 31%                              | 0                   | 0        | N/A         | absent                  | absent       |
| Somatic   |                 |                 |                |                    | BCORL1           | c.3179_1788insGATGGATT | p.F1060fs    | 36%            | 0                                | 0                   | N/A      | absent      | absent                  |              |
| Family 8  | II-1            | MDS             | PBMNC          | Gene panel         | Germline         | RUNX1                  | c.958C>T     | p.R320*        | 39%                              | 0                   | 0        | 48          | absent                  | 17           |
|           |                 |                 |                |                    | Germline         | IDH1                   | c.548A>G     | p.Y183C        | 58%                              | 2839                | 1.00     | 27.2        | 1 submission (not prov) | absent       |
|           |                 |                 |                |                    | Somatic          | RUNX1                  | c.322T>C     | p.C108R        | 26%                              | 0                   | 0        | 27.4        | absent                  | 1            |
|           | III-1           | Pre             | PBMNC          | Gene panel         | Germline         | RUNX1                  | c.958C>T     | p.R320*        | 44%                              | 0                   | 0        | 48          | absent                  | 17           |
| Family 9  | IV-1            | MDS/AML         | BMMNC/ PBMNC   | Gene panel /Sanger | Germline         | RUNX1                  | c.958C>T     | p.R320*        | 47%                              | 0                   | 0        | 48          | absent                  | 17           |
|           |                 |                 |                |                    | Germline         | CEBPA                  | c.584_589dup | p.H195_P196dup | 50%                              | 1206                | 3.25     | N/A         | 2 submissions (B/LB)    | 11           |
|           |                 |                 |                |                    | Somatic          | RUNX1                  | c.491T>A     | p.V164D        | 12%                              | 0                   | 0        | 29.9        | absent                  | 2            |
|           |                 |                 |                |                    | Somatic          | EZH2                   | c.433T>G     | p.F145V        | 28%                              | 0                   | 0        | 23.8        | absent                  | absent       |
| V-5       | ALL (remission) | PBMNC           | Gene panel     | Germline           | RUNX1            | c.958C>T               | p.R320*      | 49%            | 0                                | 0                   | 48       | absent      | 17                      |              |
| Family 10 | II-2            | T-NHL/ tMDS     | PBMNC/ hair    | WES                | Germline         | RUNX1                  | c.968-10C>A  | p.A324Lfs*7    | 51%                              | 0                   | 0        | N/A         | absent                  | 1            |
|           |                 |                 |                |                    | Somatic          | KRAS                   | c.35G>A      | p.G12D         | 41%                              | 0                   | 0        | 25.3        | 24 submissions (P)      | 15,022       |

**Supplemental Table 3 - ACMG classifications with ASH- ClinGen Myeloid Malignancy Expert Panel *RUNX1***

| Family                  | RUNX1 variant                                     | ACMG – ASH-<br>ClinGen classification | Rules applied                                                                                                                                                                                                                                                                                                                                                                                                                                                                                                    |
|-------------------------|---------------------------------------------------|---------------------------------------|------------------------------------------------------------------------------------------------------------------------------------------------------------------------------------------------------------------------------------------------------------------------------------------------------------------------------------------------------------------------------------------------------------------------------------------------------------------------------------------------------------------|
| <b>Family 1</b>         | c.-626163_59-54714del -<br>Deletion P1Ex1-2 (p.?) | Likely Pathogenic                     | Absent from controls (PM2), Deletion specific to RUNX1c isoform (PVS1_moderate), 3 probands meeting RUNX1-phenotypic criteria (PS4_moderate, see also PMID: 29666006, PMID: 26849013).                                                                                                                                                                                                                                                                                                                           |
| <b>Family 2</b>         | c.59-32,857_508+2,502del<br>(p.E20-G170 del)      | Likely Pathogenic                     | Absent from controls (PM2), Null variant in a gene where LOF is a known mechanism of disease (PVS1_strong), Segregation in 3 affected family members (PP1 supporting), 1 proband meeting RUNX1-phenotypic criteria (PS4_supporting)                                                                                                                                                                                                                                                                              |
| <b>Family 3</b>         | c.334delC (p.L112Cfs*10)                          | Pathogenic                            | Absent from controls (PM2), Null variant in a gene where LOF is a known mechanism of disease (PVS1), 1 proband meeting RUNX1-phenotypic criteria (PS4_supporting)                                                                                                                                                                                                                                                                                                                                                |
| <b>Family 4</b>         | c.506G>T (p.R169I)                                | Likely Pathogenic                     | Absent from controls (PM2), Computational evidence supports deleterious effect (PP3), Variant affecting hotspot residue (PM1), Segregation in 4 affected family members (PP1 supporting), 1 proband meeting RUNX1-phenotypic criteria (PS4_supporting)                                                                                                                                                                                                                                                           |
| <b>Family 5</b>         | c.593A>T (p.D198V)                                | Likely Pathogenic                     | Absent from controls (PM2), Computational evidence supports deleterious effect (PP3). Variant affecting hotspot residue (PM1), 1 proband meeting RUNX1-phenotypic criteria (PS4_supporting)                                                                                                                                                                                                                                                                                                                      |
| <b>Family 6</b>         | c.596G>A (p.G199Q)                                | Likely Pathogenic                     | Absent from controls (PM2), Computational evidence supports deleterious effect (PP3), Variant affecting one of the other non-hotspot AA residues 105-204 within the RHD (PM1_Supporting); data from a secondary assay demonstrating altered function (PS3 not able to be applied, see PMID: 24732596); 3 or 4 meioses observed within one or across multiple families (PP1_Supporting); 2-3 probands meeting RUNX1-phenotypic criteria (PS4_Moderate, see also PMID: 25159113; PMID: 26884589; PMID: 24732596).  |
| <b>Family 7</b>         | c.611G>A (p.R204Q)                                | Pathogenic                            | Absent from controls (PM2), Computational evidence supports deleterious effect (PP3), Variant affecting hotspot residue (PM1), ≥ 7 meioses observed within one or across multiple families (PP1_Strong), 3 probands meeting RUNX1-phenotypic criteria (PS4_moderate, see also PMID: 19357396 ; PMID: 27112265; PMID: 26316320; PMID: 27479822)                                                                                                                                                                   |
| <b>Family 8 &amp; 9</b> | c.958C>T (p.R320*)                                | Pathogenic                            | Absent from controls (PM2), Null variant in a gene where LOF is a known mechanism of disease (PVS1_strong), ≥ 7 meioses observed within one or across multiple families (PP1_Strong), 3 probands meeting RUNX1-phenotypic criteria (PS4_moderate, see also PMID: 18723428)                                                                                                                                                                                                                                       |
| <b>Family 10</b>        | c.968-10C>A<br>(p.A324Lfs*7)                      | Pathogenic                            | Absent from controls (PM2), Predicted null variant in a gene where LOF is a known mechanism of disease (PVS1_Strong applied due to RNA studies, therefore PS3 not applied), Computational evidence supports deleterious effect (PP3), De novo (maternity and paternity confirmed) in a patient with the disease and no ancestral family history (PS2_supporting), 3 or 4 meioses observed within one or across multiple families (PP1_Supporting), 1 proband meeting RUNX1-phenotypic criteria (PS4_supporting). |
